# Supplementary material for: Atropselective syntheses of (−) and (+) rugulotrosin A utilizing point-to-axial chirality transfer
Source: Springer Nature journal article supplement (doi:10.1038/nchem.2173), 2015-02-02
Supplement: 41557_2015_BFnchem2173_MOESM39_ESM.cif [file 41557_2015_BFnchem2173_MOESM39_ESM.cif]

data_tian11a_0m


_refine_ls_number_constraints   1
#Added by publCIF


_diffrn_radiation_monochromator   Montel
#Added by publCIF


_cell_special_details   ?
#Added by publCIF


_audit_update_record
;
2014-07-02 # Formatted by publCIF
;
_audit_creation_date              2014-07-02
_audit_creation_method
;
Olex2 1.2
(compiled 2014.06.18 svn.r2945 for OlexSys, GUI svn.r4846)
;
_shelxl_version_number            2013-4
_publ_contact_author_address      ?
_publ_contact_author_email        ?
_publ_contact_author_name         ''
_publ_contact_author_phone        ?
_publ_section_references
;
Dolomanov, O. V., Bourhis, L. J., Gildea, R. J., Howard, J. A. K. & Puschmann,
H. (2009). <i>J. Appl. Cryst.</i> <b>42</b>, 339--341.

Sheldrick, G. M. (2008). <i>Acta Cryst.</i> A<b>64</b>, 112--122.

Sheldrick, G. M. (2008). <i>Acta Cryst.</i> A<b>64</b>, 112--122.
;
_chemical_name_common             ?
_chemical_name_systematic
;
 ?
;
_chemical_formula_moiety          'C34 H34 O14, 0.48(C H2 Cl2)'
_chemical_formula_sum             'C34.48 H34.96 Cl0.96 O14'
_chemical_formula_weight          707.21
_chemical_absolute_configuration  rmad
_chemical_melting_point           ?
loop_
  _atom_type_symbol
  _atom_type_description
  _atom_type_scat_dispersion_real
  _atom_type_scat_dispersion_imag
  _atom_type_scat_source
 'C' 'C' 0.0181 0.0091 'International Tables Vol C Tables 4.2.6.8 and 6.1.1.4'
 'H' 'H' 0.0000 0.0000 'International Tables Vol C Tables 4.2.6.8 and 6.1.1.4'
 'O' 'O' 0.0492 0.0322 'International Tables Vol C Tables 4.2.6.8 and 6.1.1.4'
 'Cl' 'Cl' 0.3639 0.7018 'International Tables Vol C Tables 4.2.6.8 and 6.1.1.4'

_shelx_space_group_comment
;
The symmetry employed for this shelxl refinement is uniquely defined
by the following loop, which should always be used as a source of
symmetry information in preference to the above space-group names.
They are only intended as comments.
;
_space_group_crystal_system       'orthorhombic'
_space_group_IT_number            20
_space_group_name_H-M_alt         'C 2 2 21'
_space_group_name_Hall            'C 2c 2'
loop_
  _space_group_symop_operation_xyz
 'x, y, z'
 'x, -y, -z'
 '-x, y, -z+1/2'
 '-x, -y, z+1/2'
 'x+1/2, y+1/2, z'
 'x+1/2, -y+1/2, -z'
 '-x+1/2, y+1/2, -z+1/2'
 '-x+1/2, -y+1/2, z+1/2'

_cell_length_a                    9.8002(8)
_cell_length_b                    11.4061(10)
_cell_length_c                    30.952(3)
_cell_angle_alpha                 90
_cell_angle_beta                  90
_cell_angle_gamma                 90
_cell_volume                      3459.9(5)
_cell_formula_units_Z             4
_cell_measurement_reflns_used     9192
_cell_measurement_temperature     100(2)
_cell_measurement_theta_max       66.629
_cell_measurement_theta_min       2.856
_shelx_estimated_absorpt_T_max    ?
_shelx_estimated_absorpt_T_min    ?
_exptl_absorpt_coefficient_mu     1.543
_exptl_absorpt_correction_T_max   0.7528
_exptl_absorpt_correction_T_min   0.6941
_exptl_absorpt_correction_type    multi-scan
_exptl_absorpt_process_details
;
SADABS-2012/1 (Bruker,2012) was used for absorption correction.
wR2(int) was 0.1138 before and 0.0516 after correction.
The Ratio of minimum to maximum transmission is 0.9220.
The \l/2 correction factor is 0.0015.
;
_exptl_crystal_colour             'colorless'
_exptl_crystal_density_diffrn     1.358
_exptl_crystal_density_meas       ?
_exptl_crystal_density_method     ?
_exptl_crystal_description        block
_exptl_crystal_F_000              1480.3
_exptl_crystal_size_max           0.172
_exptl_crystal_size_mid           0.146
_exptl_crystal_size_min           0.112
_exptl_special_details
;
 ?
;
_exptl_transmission_factor_max    ?
_exptl_transmission_factor_min    ?
_diffrn_reflns_av_R_equivalents   0.0328
_diffrn_reflns_av_unetI/netI      0.0144
_diffrn_reflns_Laue_measured_fraction_full 0.986
_diffrn_reflns_Laue_measured_fraction_max 0.986
_diffrn_reflns_limit_h_max        11
_diffrn_reflns_limit_h_min        -11
_diffrn_reflns_limit_k_max        13
_diffrn_reflns_limit_k_min        -10
_diffrn_reflns_limit_l_max        36
_diffrn_reflns_limit_l_min        -36
_diffrn_reflns_number             37641
_diffrn_reflns_point_group_measured_fraction_full 0.977
_diffrn_reflns_point_group_measured_fraction_max 0.977
_diffrn_reflns_theta_full         66.624
_diffrn_reflns_theta_max          66.624
_diffrn_reflns_theta_min          2.855
_diffrn_ambient_temperature       100.0
_diffrn_detector_area_resol_mean  ?
_diffrn_standards_number	    0
_diffrn_standards_interval_count  0
_diffrn_standards_decay_%	    0
_diffrn_measured_fraction_theta_full 0.986
_diffrn_measured_fraction_theta_max 0.986
_diffrn_measurement_device_type   'Bruker Proteum-R'
_diffrn_measurement_method        '\w & \f scans'
_diffrn_radiation_type            CuK\a
_diffrn_radiation_wavelength      1.54178
_diffrn_source                    'rotating anode'
_reflns_Friedel_coverage          0.750
_reflns_Friedel_fraction_full     0.948
_reflns_Friedel_fraction_max      0.965
_reflns_number_gt                 2960
_reflns_number_total              2986
_reflns_special_details
;
 Data were apparently pre-merged, so _diffrn_reflns_number
 etc. will have to be added later.
 
 Reflections were merged by SHELXL according to the crystal
 class for the calculation of statistics and refinement.
 
 _reflns_Friedel_fraction is defined as the number of unique
 Friedel pairs measured divided by the number that would be
 possible theoretically, ignoring centric projections and
 systematic absences.
;
_reflns_threshold_expression      'I > 2\s(I)'
_computing_cell_refinement        'SAINT v8.34A (Bruker, 2013)'
_computing_data_collection        ?
_computing_data_reduction         'SAINT v8.34A (Bruker, 2013)'
_computing_molecular_graphics     'Olex2 (Dolomanov et al., 2009)'
_computing_publication_material   'Olex2 (Dolomanov et al., 2009)'
_computing_structure_refinement   'XL (Sheldrick, 2008)'
_computing_structure_solution     ?
_refine_diff_density_max          0.437
_refine_diff_density_min          -0.352
_refine_diff_density_rms          0.123
_refine_ls_abs_structure_details
;
 Flack x determined using 1277 quotients [(I+)-(I-)]/[(I+)+(I-)]
 (Parsons and Flack (2004), Acta Cryst. A60, s61).
;
_refine_ls_abs_structure_Flack    0.039(10)
_refine_ls_extinction_coef        .
_refine_ls_extinction_method      none
_refine_ls_goodness_of_fit_ref    1.217
_refine_ls_hydrogen_treatment     constr
_refine_ls_matrix_type            full
_refine_ls_number_parameters      243
_refine_ls_number_reflns          2986
_refine_ls_number_restraints      244
_refine_ls_R_factor_all           0.0398
_refine_ls_R_factor_gt            0.0394
_refine_ls_restrained_S_all       1.174
_refine_ls_shift/su_max           0.000
_refine_ls_shift/su_mean          0.000
_refine_ls_structure_factor_coef  Fsqd
_refine_ls_weighting_details
'w=1/[\s^2^(Fo^2^)+(0.0628P)^2^+4.8498P] where P=(Fo^2^+2Fc^2^)/3'
_refine_ls_weighting_scheme       calc
_refine_ls_wR_factor_gt           0.1254
_refine_ls_wR_factor_ref          0.1259
_refine_special_details
;
 CheckCIF Alerts and Discussion:

 PLAT077_ALERT_4_C Unitcell contains non-integer number of atoms .. Please Check

 Discussion:  The dichloromethane solvent model, which is disordered on a
 twofold axis, is also partially absent, resulting in the noninteger number of
 atoms.

 PLAT089_ALERT_3_C Poor Data / Parameter Ratio (Zmax < 18) .. 7.12 Note  
 PLAT340_ALERT_3_C Low Bond Precision on  C-C Bonds .. 0.0049 Ang.

 Discussion:  Due to the presence of one or more small satellite crystals, some
 of the low angle data were rejected, resulting in a slightly low completeness
 of 0.986 at theta full (and 96% from infinity to 1.809 Angstroms).  The
 missing data lead to a low data to parameter ratio and low C-C bond precision
 for this disordered structure, which none the less unambiguously achieves the
 goals of the present study.

 PLAT213_ALERT_2_C Atom C1A has ADP max/min Ratio .. 3.5 prolat
 PLAT213_ALERT_2_C Atom C1B has ADP max/min Ratio .. 3.5 prolat
 PLAT220_ALERT_2_C Large Non-Solvent C Ueq(max)/Ueq(min) Range 3.1 Ratio 

 Discussion:  It was necessary to use a SHELX EADP constraint on C1A and C1B to
 prevent C1B from becoming non-positive definite during refinement of this
 disordered methyl group.  The constraint resulted in a prolate ellipsoid shape.
  
;
_olex2_refinement_description
;
1. Fixed Uiso
 At 1.2 times of:
  All C(H) groups, All C(H,H) groups
 At 1.5 times of:
  All C(H,H,H) groups, All O(H) groups
2. Restrained distances
 C2-C1A
 1.54 with sigma of 0.02
 C2-C1B
 1.54 with sigma of 0.02
 C1S-Cl2S
 1.65 with sigma of 0.02
 C1S-Cl1S
 1.65 with sigma of 0.02
3. Rigid bond restraints
 All non-hydrogen atoms
 with sigma for 1-2 distances of 0.01 and sigma for 1-3 distances of 0.01
4. Uiso/Uaniso restraints and constraints
All non-hydrogen atoms have similar U: within 1.7A with sigma of 0.04 and sigma
for terminal atoms of 0.08
Uanis(C1A) = Uanis(C1B)
Uanis(Cl1S) = Uanis(Cl2S)
Uanis(C1S) = Uanis(Cl2S)
5. Others
 Sof(C1B)=Sof(H1BA)=Sof(H1BB)=Sof(H1BC)=1-FVAR(1)
 Sof(C1A)=Sof(H1AA)=Sof(H1AB)=Sof(H1AC)=FVAR(1)
 Sof(Cl1S)=Sof(C1S)=Sof(H1SA)=Sof(H1SB)=Sof(Cl2S)=FVAR(2)
6.a Ternary CH refined with riding coordinates:
 C14(H14)
6.b Secondary CH2 refined with riding coordinates:
 C1S(H1SA,H1SB), C12(H12A,H12B), C13(H13A,H13B)
6.c Aromatic/amide H refined with riding coordinates:
 C7(H7A)
6.d Idealised Me refined as rotating group:
 C17(H17A,H17B,H17C), C18(H18A,H18B,H18C), C1A(H1AA,H1AB,H1AC), C1B(H1BA,H1BB,
 H1BC)
6.e Idealised tetrahedral OH refined as rotating group:
 O4(H4), O7(H7)
;
_atom_sites_solution_hydrogens    geom
_atom_sites_solution_primary      direct
_atom_sites_solution_secondary    difmap
loop_
  _atom_site_label
  _atom_site_type_symbol
  _atom_site_fract_x
  _atom_site_fract_y
  _atom_site_fract_z
  _atom_site_U_iso_or_equiv
  _atom_site_adp_type
  _atom_site_occupancy
  _atom_site_site_symmetry_order
  _atom_site_calc_flag
  _atom_site_refinement_flags_posn
  _atom_site_refinement_flags_adp
  _atom_site_refinement_flags_occupancy
  _atom_site_disorder_assembly
  _atom_site_disorder_group
 O1 O 0.1684(3) 0.7447(3) 0.28747(8) 0.0287(6) Uani 1 1 d . U . . .
 O2 O 0.2166(3) 0.8286(2) 0.39773(7) 0.0203(6) Uani 1 1 d . U . . .
 O3 O 0.3406(3) 0.7130(3) 0.33401(10) 0.0314(7) Uani 1 1 d . U . . .
 O4 O 0.0492(3) 0.4547(2) 0.44736(8) 0.0248(6) Uani 1 1 d . U . . .
 H4 H -0.0031 0.4639 0.4261 0.037 Uiso 1 1 calc GR . . . .
 O5 O -0.0676(3) 0.5646(2) 0.38507(8) 0.0254(6) Uani 1 1 d . U . . .
 O6 O -0.2297(2) 0.7463(3) 0.36335(9) 0.0289(6) Uani 1 1 d . U . . .
 O7 O 0.2441(3) 0.9918(2) 0.32463(8) 0.0233(6) Uani 1 1 d . U . . .
 H7 H 0.2928 1.0238 0.3436 0.035 Uiso 1 1 calc GR . . . .
 Cl1S Cl 0.6383(5) 0.6378(4) 0.45668(13) 0.0368(11) Uani 0.239(4) 1 d D U P A
 -1
 C1S C 0.756(2) 0.540(2) 0.4777(6) 0.0368(11) Uani 0.239(4) 1 d D U P A -1
 H1SA H 0.7737 0.4791 0.4557 0.044 Uiso 0.239(4) 1 calc R . P A -1
 H1SB H 0.8425 0.5829 0.4825 0.044 Uiso 0.239(4) 1 calc R . P A -1
 Cl2S Cl 0.7116(5) 0.4711(5) 0.52533(15) 0.0368(11) Uani 0.239(4) 1 d D U P A
 -1
 C17 C 0.2476(6) 0.6850(4) 0.25443(14) 0.0433(12) Uani 1 1 d . U . . .
 H17A H 0.2632 0.6035 0.2632 0.065 Uiso 1 1 calc GR . . . .
 H17B H 0.3355 0.7248 0.2508 0.065 Uiso 1 1 calc GR . . . .
 H17C H 0.1975 0.6865 0.2270 0.065 Uiso 1 1 calc GR . . . .
 C16 C 0.2305(3) 0.7534(3) 0.32577(10) 0.0198(7) Uani 1 1 d . U . . .
 C15 C 0.1401(3) 0.8205(3) 0.35823(10) 0.0167(7) Uani 1 1 d . U . . .
 C6 C 0.2211(3) 0.7323(3) 0.42383(10) 0.0184(7) Uani 1 1 d . U . . .
 C5 C 0.1288(3) 0.6390(3) 0.41925(10) 0.0158(7) Uani 1 1 d . U . . .
 C4 C 0.1361(3) 0.5462(3) 0.44987(11) 0.0170(7) Uani 1 1 d . U . . .
 C3 C 0.2290(4) 0.5485(3) 0.48375(10) 0.0181(7) Uani 1 1 d . U . . .
 C7 C 0.3156(4) 0.7339(4) 0.45688(12) 0.0298(9) Uani 1 1 d . U . . .
 H7A H 0.3795 0.7963 0.4588 0.036 Uiso 1 1 calc R . . . .
 C2 C 0.3175(4) 0.6440(4) 0.48739(12) 0.0281(9) Uani 1 1 d D U . . .
 C8 C 0.0166(3) 0.6470(3) 0.38873(10) 0.0164(7) Uani 1 1 d . U . . .
 C9 C 0.0062(3) 0.7572(3) 0.36487(10) 0.0157(7) Uani 1 1 d . U . . .
 C11 C -0.1156(4) 0.8057(3) 0.35324(11) 0.0200(7) Uani 1 1 d . U . . .
 C18 C -0.3626(4) 0.7967(4) 0.35610(14) 0.0343(10) Uani 1 1 d . U . . .
 H18A H -0.4320 0.7485 0.3704 0.051 Uiso 1 1 calc GR . . . .
 H18B H -0.3810 0.7996 0.3250 0.051 Uiso 1 1 calc GR . . . .
 H18C H -0.3650 0.8763 0.3680 0.051 Uiso 1 1 calc GR . . . .
 C12 C -0.1278(4) 0.9223(3) 0.33186(12) 0.0240(8) Uani 1 1 d . U . . .
 H12A H -0.1586 0.9807 0.3534 0.029 Uiso 1 1 calc R . . . .
 H12B H -0.1981 0.9177 0.3089 0.029 Uiso 1 1 calc R . . . .
 C13 C 0.0060(4) 0.9633(3) 0.31203(11) 0.0224(8) Uani 1 1 d . U . . .
 H13A H 0.0253 0.9170 0.2857 0.027 Uiso 1 1 calc R . . . .
 H13B H -0.0020 1.0467 0.3036 0.027 Uiso 1 1 calc R . . . .
 C14 C 0.1227(4) 0.9489(3) 0.34388(10) 0.0185(7) Uani 1 1 d . U . . .
 H14 H 0.1024 0.9975 0.3700 0.022 Uiso 1 1 calc R . . . .
 C1A C 0.408(2) 0.652(2) 0.5265(5) 0.049(3) Uani 0.75(6) 1 d D U P B 1
 H1AA H 0.3525 0.6647 0.5523 0.073 Uiso 0.75(6) 1 calc GR . P B 1
 H1AB H 0.4719 0.7178 0.5230 0.073 Uiso 0.75(6) 1 calc GR . P B 1
 H1AC H 0.4601 0.5791 0.5296 0.073 Uiso 0.75(6) 1 calc GR . P B 1
 C1B C 0.433(6) 0.662(6) 0.5205(18) 0.049(3) Uani 0.25(6) 1 d D U P B 2
 H1BA H 0.4264 0.7409 0.5329 0.073 Uiso 0.25(6) 1 calc GR . P B 2
 H1BB H 0.5217 0.6533 0.5061 0.073 Uiso 0.25(6) 1 calc GR . P B 2
 H1BC H 0.4252 0.6036 0.5436 0.073 Uiso 0.25(6) 1 calc GR . P B 2

loop_
  _atom_site_aniso_label
  _atom_site_aniso_U_11
  _atom_site_aniso_U_22
  _atom_site_aniso_U_33
  _atom_site_aniso_U_23
  _atom_site_aniso_U_13
  _atom_site_aniso_U_12
 O1 0.0388(15) 0.0313(15) 0.0159(12) -0.0034(11) -0.0006(10) 0.0126(13)
 O2 0.0258(13) 0.0198(13) 0.0153(11) 0.0061(9) -0.0087(10) -0.0071(10)
 O3 0.0200(12) 0.0391(17) 0.0352(15) 0.0050(13) 0.0019(11) 0.0063(12)
 O4 0.0267(13) 0.0186(14) 0.0291(14) 0.0076(11) -0.0081(11) -0.0071(11)
 O5 0.0211(12) 0.0250(14) 0.0301(14) 0.0067(11) -0.0097(10) -0.0068(11)
 O6 0.0135(12) 0.0303(15) 0.0431(15) 0.0039(13) -0.0049(11) 0.0003(11)
 O7 0.0265(13) 0.0262(14) 0.0173(11) 0.0046(10) -0.0026(10) -0.0094(11)
 Cl1S 0.041(2) 0.0406(19) 0.0284(16) 0.0012(12) 0.0003(13) 0.0057(14)
 C1S 0.041(2) 0.0406(19) 0.0284(16) 0.0012(12) 0.0003(13) 0.0057(14)
 Cl2S 0.041(2) 0.0406(19) 0.0284(16) 0.0012(12) 0.0003(13) 0.0057(14)
 C17 0.063(3) 0.046(3) 0.0208(19) -0.0029(18) 0.0117(19) 0.018(2)
 C16 0.0195(16) 0.0205(18) 0.0193(16) 0.0050(14) 0.0017(13) -0.0020(14)
 C15 0.0157(16) 0.0211(18) 0.0133(15) 0.0004(12) -0.0048(12) -0.0017(13)
 C6 0.0230(16) 0.0177(18) 0.0145(15) 0.0039(13) -0.0008(13) -0.0026(14)
 C5 0.0146(15) 0.0190(17) 0.0138(15) 0.0002(13) 0.0003(12) -0.0017(13)
 C4 0.0161(16) 0.0163(17) 0.0185(16) -0.0001(13) 0.0036(13) -0.0017(14)
 C3 0.0227(17) 0.0164(18) 0.0152(15) 0.0020(14) 0.0000(13) -0.0016(14)
 C7 0.033(2) 0.029(2) 0.0269(19) 0.0102(16) -0.0162(16) -0.0143(18)
 C2 0.033(2) 0.028(2) 0.0232(18) 0.0073(15) -0.0145(16) -0.0085(18)
 C8 0.0147(15) 0.0198(17) 0.0148(15) -0.0022(13) 0.0016(12) -0.0008(14)
 C9 0.0166(15) 0.0181(16) 0.0123(14) -0.0020(13) -0.0009(12) -0.0028(14)
 C11 0.0194(16) 0.0211(18) 0.0194(16) -0.0047(13) -0.0033(13) 0.0004(14)
 C18 0.0176(18) 0.047(3) 0.038(2) -0.0031(19) -0.0022(16) 0.0096(18)
 C12 0.0231(17) 0.0233(19) 0.0255(18) 0.0006(15) -0.0069(15) 0.0046(15)
 C13 0.0292(19) 0.0198(19) 0.0181(16) 0.0021(14) -0.0065(14) 0.0019(16)
 C14 0.0251(17) 0.0175(18) 0.0128(14) 0.0023(12) -0.0022(14) -0.0021(15)
 C1A 0.069(7) 0.040(5) 0.036(5) 0.028(4) -0.035(5) -0.034(5)
 C1B 0.069(7) 0.040(5) 0.036(5) 0.028(4) -0.035(5) -0.034(5)

_geom_special_details
;
 All esds (except the esd in the dihedral angle between two l.s. planes)
 are estimated using the full covariance matrix.  The cell esds are taken
 into account individually in the estimation of esds in distances, angles
 and torsion angles; correlations between esds in cell parameters are only
 used when they are defined by crystal symmetry.  An approximate (isotropic)
 treatment of cell esds is used for estimating esds involving l.s. planes.
;
loop_
  _geom_bond_atom_site_label_1
  _geom_bond_atom_site_label_2
  _geom_bond_distance
  _geom_bond_site_symmetry_2
  _geom_bond_publ_flag
 O1 C17 1.453(5) . ?
 O1 C16 1.336(4) . ?
 O2 C15 1.437(4) . ?
 O2 C6 1.364(4) . ?
 O3 C16 1.201(4) . ?
 O4 H4 0.8400 . ?
 O4 C4 1.350(4) . ?
 O5 C8 1.257(4) . ?
 O6 C11 1.344(5) . ?
 O6 C18 1.441(4) . ?
 O7 H7 0.8400 . ?
 O7 C14 1.418(4) . ?
 Cl1S C1S 1.729(18) . ?
 C1S H1SA 0.9900 . ?
 C1S H1SB 0.9900 . ?
 C1S Cl2S 1.727(17) . ?
 C17 H17A 0.9800 . ?
 C17 H17B 0.9800 . ?
 C17 H17C 0.9800 . ?
 C16 C15 1.543(5) . ?
 C15 C9 1.512(4) . ?
 C15 C14 1.540(5) . ?
 C6 C5 1.404(5) . ?
 C6 C7 1.380(5) . ?
 C5 C4 1.423(5) . ?
 C5 C8 1.452(5) . ?
 C4 C3 1.389(5) . ?
 C3 C3 1.495(6) 2_566 ?
 C3 C2 1.396(5) . ?
 C7 H7A 0.9500 . ?
 C7 C2 1.394(5) . ?
 C2 C1A 1.506(10) . ?
 C2 C1B 1.54(3) . ?
 C8 C9 1.461(5) . ?
 C9 C11 1.364(5) . ?
 C11 C12 1.490(5) . ?
 C18 H18A 0.9800 . ?
 C18 H18B 0.9800 . ?
 C18 H18C 0.9800 . ?
 C12 H12A 0.9900 . ?
 C12 H12B 0.9900 . ?
 C12 C13 1.521(5) . ?
 C13 H13A 0.9900 . ?
 C13 H13B 0.9900 . ?
 C13 C14 1.518(5) . ?
 C14 H14 1.0000 . ?
 C1A H1AA 0.9800 . ?
 C1A H1AB 0.9800 . ?
 C1A H1AC 0.9800 . ?
 C1B H1BA 0.9800 . ?
 C1B H1BB 0.9800 . ?
 C1B H1BC 0.9800 . ?

loop_
  _geom_angle_atom_site_label_1
  _geom_angle_atom_site_label_2
  _geom_angle_atom_site_label_3
  _geom_angle
  _geom_angle_site_symmetry_1
  _geom_angle_site_symmetry_3
  _geom_angle_publ_flag
 C16 O1 C17 114.6(3) . . ?
 C6 O2 C15 118.0(3) . . ?
 C4 O4 H4 109.5 . . ?
 C11 O6 C18 121.0(3) . . ?
 C14 O7 H7 109.5 . . ?
 Cl1S C1S H1SA 108.1 . . ?
 Cl1S C1S H1SB 108.1 . . ?
 H1SA C1S H1SB 107.3 . . ?
 Cl2S C1S Cl1S 116.6(12) . . ?
 Cl2S C1S H1SA 108.1 . . ?
 Cl2S C1S H1SB 108.1 . . ?
 O1 C17 H17A 109.5 . . ?
 O1 C17 H17B 109.5 . . ?
 O1 C17 H17C 109.5 . . ?
 H17A C17 H17B 109.5 . . ?
 H17A C17 H17C 109.5 . . ?
 H17B C17 H17C 109.5 . . ?
 O1 C16 C15 110.7(3) . . ?
 O3 C16 O1 124.7(3) . . ?
 O3 C16 C15 124.6(3) . . ?
 O2 C15 C16 106.7(3) . . ?
 O2 C15 C9 111.6(3) . . ?
 O2 C15 C14 104.0(3) . . ?
 C9 C15 C16 110.5(3) . . ?
 C9 C15 C14 113.4(3) . . ?
 C14 C15 C16 110.4(3) . . ?
 O2 C6 C5 122.0(3) . . ?
 O2 C6 C7 116.8(3) . . ?
 C7 C6 C5 121.1(3) . . ?
 C6 C5 C4 117.7(3) . . ?
 C6 C5 C8 120.4(3) . . ?
 C4 C5 C8 121.2(3) . . ?
 O4 C4 C5 120.4(3) . . ?
 O4 C4 C3 118.1(3) . . ?
 C3 C4 C5 121.5(3) . . ?
 C4 C3 C3 119.6(3) . 2_566 ?
 C4 C3 C2 118.8(3) . . ?
 C2 C3 C3 121.5(3) . 2_566 ?
 C6 C7 H7A 119.9 . . ?
 C6 C7 C2 120.1(4) . . ?
 C2 C7 H7A 119.9 . . ?
 C3 C2 C1A 118.7(9) . . ?
 C3 C2 C1B 128(2) . . ?
 C7 C2 C3 120.7(3) . . ?
 C7 C2 C1A 120.5(9) . . ?
 C7 C2 C1B 111(2) . . ?
 O5 C8 C5 120.6(3) . . ?
 O5 C8 C9 123.5(3) . . ?
 C5 C8 C9 115.8(3) . . ?
 C8 C9 C15 114.7(3) . . ?
 C11 C9 C15 122.0(3) . . ?
 C11 C9 C8 122.9(3) . . ?
 O6 C11 C9 117.6(3) . . ?
 O6 C11 C12 119.1(3) . . ?
 C9 C11 C12 123.3(3) . . ?
 O6 C18 H18A 109.5 . . ?
 O6 C18 H18B 109.5 . . ?
 O6 C18 H18C 109.5 . . ?
 H18A C18 H18B 109.5 . . ?
 H18A C18 H18C 109.5 . . ?
 H18B C18 H18C 109.5 . . ?
 C11 C12 H12A 109.1 . . ?
 C11 C12 H12B 109.1 . . ?
 C11 C12 C13 112.6(3) . . ?
 H12A C12 H12B 107.8 . . ?
 C13 C12 H12A 109.1 . . ?
 C13 C12 H12B 109.1 . . ?
 C12 C13 H13A 109.5 . . ?
 C12 C13 H13B 109.5 . . ?
 H13A C13 H13B 108.1 . . ?
 C14 C13 C12 110.7(3) . . ?
 C14 C13 H13A 109.5 . . ?
 C14 C13 H13B 109.5 . . ?
 O7 C14 C15 110.8(3) . . ?
 O7 C14 C13 108.8(3) . . ?
 O7 C14 H14 108.4 . . ?
 C15 C14 H14 108.4 . . ?
 C13 C14 C15 111.9(3) . . ?
 C13 C14 H14 108.4 . . ?
 C2 C1A H1AA 109.5 . . ?
 C2 C1A H1AB 109.5 . . ?
 C2 C1A H1AC 109.5 . . ?
 H1AA C1A H1AB 109.5 . . ?
 H1AA C1A H1AC 109.5 . . ?
 H1AB C1A H1AC 109.5 . . ?
 C2 C1B H1BA 109.5 . . ?
 C2 C1B H1BB 109.5 . . ?
 C2 C1B H1BC 109.5 . . ?
 H1BA C1B H1BB 109.5 . . ?
 H1BA C1B H1BC 109.5 . . ?
 H1BB C1B H1BC 109.5 . . ?

loop_
  _geom_torsion_atom_site_label_1
  _geom_torsion_atom_site_label_2
  _geom_torsion_atom_site_label_3
  _geom_torsion_atom_site_label_4
  _geom_torsion
  _geom_torsion_site_symmetry_1
  _geom_torsion_site_symmetry_2
  _geom_torsion_site_symmetry_3
  _geom_torsion_site_symmetry_4
  _geom_torsion_publ_flag
 O1 C16 C15 O2 -178.3(3) . . . . ?
 O1 C16 C15 C9 60.3(4) . . . . ?
 O1 C16 C15 C14 -65.8(4) . . . . ?
 O2 C15 C9 C8 -48.0(4) . . . . ?
 O2 C15 C9 C11 125.7(3) . . . . ?
 O2 C15 C14 O7 78.0(3) . . . . ?
 O2 C15 C14 C13 -160.3(3) . . . . ?
 O2 C6 C5 C4 -175.9(3) . . . . ?
 O2 C6 C5 C8 -5.6(5) . . . . ?
 O2 C6 C7 C2 173.8(4) . . . . ?
 O3 C16 C15 O2 2.7(5) . . . . ?
 O3 C16 C15 C9 -118.7(4) . . . . ?
 O3 C16 C15 C14 115.2(4) . . . . ?
 O4 C4 C3 C3 -0.6(5) . . . 2_566 ?
 O4 C4 C3 C2 -178.5(3) . . . . ?
 O5 C8 C9 C15 -154.6(3) . . . . ?
 O5 C8 C9 C11 31.8(5) . . . . ?
 O6 C11 C12 C13 -164.9(3) . . . . ?
 C17 O1 C16 O3 -2.4(6) . . . . ?
 C17 O1 C16 C15 178.6(3) . . . . ?
 C16 C15 C9 C8 70.5(4) . . . . ?
 C16 C15 C9 C11 -115.8(3) . . . . ?
 C16 C15 C14 O7 -36.1(4) . . . . ?
 C16 C15 C14 C13 85.6(4) . . . . ?
 C15 O2 C6 C5 -16.3(5) . . . . ?
 C15 O2 C6 C7 167.6(3) . . . . ?
 C15 C9 C11 O6 -175.2(3) . . . . ?
 C15 C9 C11 C12 2.1(5) . . . . ?
 C6 O2 C15 C16 -78.6(3) . . . . ?
 C6 O2 C15 C9 42.1(4) . . . . ?
 C6 O2 C15 C14 164.7(3) . . . . ?
 C6 C5 C4 O4 179.4(3) . . . . ?
 C6 C5 C4 C3 1.4(5) . . . . ?
 C6 C5 C8 O5 -178.8(3) . . . . ?
 C6 C5 C8 C9 -1.4(5) . . . . ?
 C6 C7 C2 C3 3.3(6) . . . . ?
 C6 C7 C2 C1A -172.6(11) . . . . ?
 C6 C7 C2 C1B 179(3) . . . . ?
 C5 C6 C7 C2 -2.3(6) . . . . ?
 C5 C4 C3 C3 177.4(3) . . . 2_566 ?
 C5 C4 C3 C2 -0.5(5) . . . . ?
 C5 C8 C9 C15 28.1(4) . . . . ?
 C5 C8 C9 C11 -145.5(3) . . . . ?
 C4 C5 C8 O5 -8.8(5) . . . . ?
 C4 C5 C8 C9 168.5(3) . . . . ?
 C4 C3 C2 C7 -1.9(6) . . . . ?
 C4 C3 C2 C1A 174.1(11) . . . . ?
 C4 C3 C2 C1B -176(4) . . . . ?
 C3 C3 C2 C7 -179.7(4) 2_566 . . . ?
 C3 C3 C2 C1A -3.7(12) 2_566 . . . ?
 C3 C3 C2 C1B 6(4) 2_566 . . . ?
 C7 C6 C5 C4 0.0(5) . . . . ?
 C7 C6 C5 C8 170.3(3) . . . . ?
 C8 C5 C4 O4 9.2(5) . . . . ?
 C8 C5 C4 C3 -168.8(3) . . . . ?
 C8 C9 C11 O6 -2.1(5) . . . . ?
 C8 C9 C11 C12 175.2(3) . . . . ?
 C9 C15 C14 O7 -160.6(3) . . . . ?
 C9 C15 C14 C13 -39.0(4) . . . . ?
 C9 C11 C12 C13 17.9(5) . . . . ?
 C11 C12 C13 C14 -47.7(4) . . . . ?
 C18 O6 C11 C9 173.8(3) . . . . ?
 C18 O6 C11 C12 -3.6(5) . . . . ?
 C12 C13 C14 O7 -178.0(3) . . . . ?
 C12 C13 C14 C15 59.1(4) . . . . ?
 C14 C15 C9 C8 -165.0(3) . . . . ?
 C14 C15 C9 C11 8.6(4) . . . . ?

_smtbx_masks_special_details      ?
loop_
  _smtbx_masks_void_nr
  _smtbx_masks_void_average_x
  _smtbx_masks_void_average_y
  _smtbx_masks_void_average_z
  _smtbx_masks_void_volume
  _smtbx_masks_void_count_electrons
  _smtbx_masks_void_content
 1 0.000 0.469 0.250 57.2 9.2 ?
 2 0.000 0.531 0.750 57.2 9.3 ?
 3 0.500 0.031 0.750 57.2 9.3 ?
 4 0.500 0.969 0.250 57.2 9.2 ?

_shelx_res_file
;
TITL tian11a_0m in C222(1)
CELL 1.54178 9.8002 11.4061 30.9525 90 90 90
ZERR 8 0.0008 0.001 0.0026 0 0 0
LATT -7
SYMM +X,-Y,-Z
SYMM -X,+Y,0.5-Z
SYMM -X,-Y,0.5+Z

SFAC C H O Cl
UNIT 152 160 56 1
DFIX 1.54 C2 C1A
DFIX 1.54 C2 C1B
DFIX 1.65 C1S Cl2S
DFIX 1.65 C1S Cl1S
DELU
SIMU 0.04 0.08 1.7
EADP C1A C1B
EADP Cl1S Cl2S
EADP C1S Cl2S

L.S. 30
PLAN  -20 0 0
TEMP -173.15
HTAB
BOND $H
CONF
MORE -1
fmap 2
acta
REM <HKL>//cicserver1/xray/structure%20workup/tian11a/tian11a_0m-mask.hkl</HKL>

WGHT    0.062800    4.849800
FVAR       0.16371   0.75104   0.23917
O1    3    0.168431    0.744673    0.287474    11.00000    0.03883    0.03132 =
         0.01588   -0.00336   -0.00064    0.01264
O2    3    0.216550    0.828594    0.397731    11.00000    0.02582    0.01981 =
         0.01529    0.00609   -0.00874   -0.00707
O3    3    0.340641    0.713046    0.334014    11.00000    0.01999    0.03910 =
         0.03515    0.00496    0.00185    0.00628
O4    3    0.049164    0.454682    0.447355    11.00000    0.02666    0.01862 =
         0.02910    0.00762   -0.00814   -0.00710
AFIX 147
H4    2   -0.003122    0.463901    0.426121    11.00000   -1.50000
AFIX   0
O5    3   -0.067566    0.564568    0.385071    11.00000    0.02108    0.02499 =
         0.03009    0.00675   -0.00975   -0.00680
O6    3   -0.229745    0.746298    0.363355    11.00000    0.01347    0.03030 =
         0.04308    0.00390   -0.00485    0.00027
O7    3    0.244107    0.991813    0.324626    11.00000    0.02652    0.02621 =
         0.01731    0.00459   -0.00263   -0.00938
AFIX 147
H7    2    0.292825    1.023814    0.343586    11.00000   -1.50000
AFIX   0

PART -1
CL1S  4    0.638267    0.637775    0.456679    31.00000    0.04133    0.04063 =
         0.02836    0.00120    0.00026    0.00569
C1S   1    0.755839    0.540189    0.477697    31.00000    0.04133    0.04063 =
         0.02836    0.00120    0.00026    0.00569
AFIX  23
H1SA  2    0.773693    0.479142    0.455674    31.00000   -1.20000
H1SB  2    0.842478    0.582873    0.482503    31.00000   -1.20000
AFIX   0
CL2S  4    0.711561    0.471132    0.525334    31.00000    0.04133    0.04063 =
         0.02836    0.00120    0.00026    0.00569

PART 0
C17   1    0.247606    0.684991    0.254434    11.00000    0.06312    0.04588 =
         0.02081   -0.00294    0.01170    0.01812
AFIX 137
H17A  2    0.263217    0.603508    0.263176    11.00000   -1.50000
H17B  2    0.335507    0.724752    0.250802    11.00000   -1.50000
H17C  2    0.197495    0.686459    0.227041    11.00000   -1.50000
AFIX   0
C16   1    0.230475    0.753388    0.325767    11.00000    0.01949    0.02054 =
         0.01932    0.00499    0.00173   -0.00199
C15   1    0.140149    0.820524    0.358229    11.00000    0.01574    0.02107 =
         0.01330    0.00037   -0.00482   -0.00173
C6    1    0.221125    0.732335    0.423831    11.00000    0.02304    0.01766 =
         0.01447    0.00386   -0.00079   -0.00257
C5    1    0.128830    0.639042    0.419248    11.00000    0.01457    0.01904 =
         0.01378    0.00021    0.00029   -0.00168
C4    1    0.136137    0.546227    0.449866    11.00000    0.01614    0.01633 =
         0.01854   -0.00015    0.00362   -0.00174
C3    1    0.229025    0.548480    0.483747    11.00000    0.02274    0.01636 =
         0.01516    0.00204    0.00000   -0.00157
C7    1    0.315597    0.733864    0.456880    11.00000    0.03342    0.02899 =
         0.02692    0.01015   -0.01619   -0.01426
AFIX  43
H7A   2    0.379476    0.796282    0.458849    11.00000   -1.20000
AFIX   0
C2    1    0.317457    0.643959    0.487386    11.00000    0.03334    0.02766 =
         0.02323    0.00728   -0.01451   -0.00853
C8    1    0.016642    0.647041    0.388733    11.00000    0.01474    0.01976 =
         0.01483   -0.00223    0.00155   -0.00076
C9    1    0.006197    0.757211    0.364866    11.00000    0.01663    0.01809 =
         0.01231   -0.00202   -0.00092   -0.00284
C11   1   -0.115632    0.805673    0.353242    11.00000    0.01941    0.02113 =
         0.01941   -0.00469   -0.00330    0.00039
C18   1   -0.362572    0.796703    0.356104    11.00000    0.01761    0.04717 =
         0.03814   -0.00307   -0.00219    0.00964
AFIX 137
H18A  2   -0.432010    0.748496    0.370370    11.00000   -1.50000
H18B  2   -0.381035    0.799607    0.325005    11.00000   -1.50000
H18C  2   -0.365029    0.876294    0.368004    11.00000   -1.50000
AFIX   0
C12   1   -0.127806    0.922256    0.331860    11.00000    0.02313    0.02331 =
         0.02553    0.00056   -0.00691    0.00456
AFIX  23
H12A  2   -0.158557    0.980748    0.353392    11.00000   -1.20000
H12B  2   -0.198080    0.917672    0.308945    11.00000   -1.20000
AFIX   0
C13   1    0.005972    0.963258    0.312033    11.00000    0.02916    0.01980 =
         0.01815    0.00206   -0.00653    0.00185
AFIX  23
H13A  2    0.025304    0.917025    0.285665    11.00000   -1.20000
H13B  2   -0.002004    1.046710    0.303611    11.00000   -1.20000
AFIX   0
C14   1    0.122656    0.948945    0.343878    11.00000    0.02513    0.01754 =
         0.01277    0.00235   -0.00215   -0.00213
AFIX  13
H14   2    0.102375    0.997501    0.370001    11.00000   -1.20000
AFIX   0
PART 1
C1A   1    0.408431    0.652095    0.526503    21.00000    0.06937    0.03988 =
         0.03637    0.02751   -0.03548   -0.03395
AFIX 137
H1AA  2    0.352464    0.664705    0.552327    21.00000   -1.50000
H1AB  2    0.471868    0.717824    0.522988    21.00000   -1.50000
H1AC  2    0.460141    0.579051    0.529642    21.00000   -1.50000
AFIX   0
PART 0
PART 2
C1B   1    0.433258    0.662111    0.520501   -21.00000    0.06937    0.03988 =
         0.03637    0.02751   -0.03548   -0.03395
AFIX 137
H1BA  2    0.426431    0.740931    0.532916   -21.00000   -1.50000
H1BB  2    0.521653    0.653296    0.506059   -21.00000   -1.50000
H1BC  2    0.425228    0.603634    0.543558   -21.00000   -1.50000
AFIX   0
HKLF 4

REM  tian11a_0m in C222(1)
REM R1 =  0.0394 for    2960 Fo > 4sig(Fo)  and  0.0398 for all    2986 data
REM    243 parameters refined using    244 restraints

END

WGHT      0.0628      4.8496

REM Instructions for potential hydrogen bonds
HTAB O4 O5
EQIV $1 x+1/2, y+1/2, z
HTAB O7 O5_$1
HTAB O7 O6_$1
HTAB C7 O4_$1
EQIV $2 x-1, y, z
HTAB C18 O3_$2
HTAB C13 O1
EQIV $3 x-1/2, y+1/2, z
HTAB C13 O3_$3

REM Highest difference peak  0.437,  deepest hole -0.352,  1-sigma level  0.123
Q1    1   0.7280  0.5000  0.5000  10.50000  0.05    0.44
Q2    1   0.2359  0.5000  0.5000  10.50000  0.05    0.40
Q3    1  -0.2318  0.9962  0.3646  11.00000  0.05    0.35
Q4    1   0.2426  0.5133  0.4506  11.00000  0.05    0.32
Q5    1  -0.2583  1.0007  0.3088  11.00000  0.05    0.31
Q6    1  -0.2709  0.9862  0.3361  11.00000  0.05    0.31
Q7    1   0.2409  1.0067  0.2995  11.00000  0.05    0.30
Q8    1   0.2527  0.9779  0.3623  11.00000  0.05    0.30
Q9    1   0.4862  0.7653  0.4566  11.00000  0.05    0.30
Q10   1   0.0173  0.7443  0.3216  11.00000  0.05    0.29
Q11   1  -0.0006  0.7548  0.4217  11.00000  0.05    0.28
Q12   1   0.4990  0.7764  0.4812  11.00000  0.05    0.28
Q13   1   0.7761  0.5577  0.4704  11.00000  0.05    0.28
Q14   1   0.5166  0.7137  0.5111  11.00000  0.05    0.28
Q15   1   0.2490  0.5022  0.4175  11.00000  0.05    0.28
Q16   1  -0.0513  0.7589  0.3105  11.00000  0.05    0.27
Q17   1   0.0377  0.7796  0.3752  11.00000  0.05    0.27
Q18   1   0.2509  1.0040  0.2631  11.00000  0.05    0.27
Q19   1   0.2740  1.0114  0.3953  11.00000  0.05    0.27
Q20   1  -0.2271  1.0131  0.2708  11.00000  0.05    0.27
;
_shelx_res_checksum               39310
_shelx_hkl_file
;
 -11  -3  -9    2.89    0.10
 -11  -3  -8    0.48    0.04
 -11  -3  -7    1.30    0.05
 -11  -3  -6    1.91    0.06
 -11  -3  -5    2.07    0.07
 -11  -3  -4    3.13    0.07
 -11  -3  -3    3.09    0.10
 -11  -3  -2   12.58    0.23
 -11  -3  -1    1.84    0.05
 -11  -1 -12    9.34    0.37
 -11  -1 -11    7.23    0.13
 -11  -1 -10    3.26    0.06
 -11  -1  -9    1.99    0.04
 -11  -1  -8   17.90    0.20
 -11  -1  -7    1.69    0.05
 -11  -1  -6    7.09    0.09
 -11  -1  -5    4.19    0.07
 -11  -1  -4   35.55    0.34
 -11  -1  -3   22.31    0.21
 -11  -1  -2   16.27    0.19
 -11  -1  -1    8.01    0.10
 -10  -6  -9    6.28    0.50
 -10  -6  -8    3.13    0.22
 -10  -6  -7    1.12    0.12
 -10  -6  -6    5.87    0.14
 -10  -6  -5    5.77    0.16
 -10  -6  -4    2.12    0.07
 -10  -6  -3    6.12    0.21
 -10  -6  -2    1.98    0.07
 -10  -6  -1    7.84    0.17
 -10  -4 -15    4.69    0.12
 -10  -4 -14    5.76    0.21
 -10  -4 -13    4.53    0.08
 -10  -4 -12   12.09    0.16
 -10  -4 -11    9.95    0.12
 -10  -4 -10   12.67    0.15
 -10  -4  -9   45.61    0.50
 -10  -4  -8    0.93    0.04
 -10  -4  -7    1.79    0.05
 -10  -4  -6    3.09    0.07
 -10  -4  -5   14.97    0.18
 -10  -4  -4    1.83    0.05
 -10  -4  -3    0.78    0.03
 -10  -4  -2    4.41    0.07
 -10  -4  -1    0.98    0.04
 -10  -2 -18   12.85    0.24
 -10  -2 -17    5.00    0.09
 -10  -2 -16    4.29    0.06
 -10  -2 -15    6.63    0.09
 -10  -2 -14    1.90    0.04
 -10  -2 -13    5.55    0.08
 -10  -2 -12   10.86    0.14
 -10  -2 -11   18.64    0.22
 -10  -2 -10    0.78    0.03
 -10  -2  -9   12.55    0.12
 -10  -2  -8    1.37    0.04
 -10  -2  -7    3.12    0.05
 -10  -2  -6   10.21    0.08
 -10  -2  -5    9.16    0.09
 -10  -2  -4   12.22    0.13
 -10  -2  -3    0.30    0.03
 -10  -2  -2   35.54    0.30
 -10  -2  -1    1.66    0.04
  -9  -7 -13    1.38    0.08
  -9  -7 -12    1.83    0.09
  -9  -7 -11    3.76    0.12
  -9  -7 -10    3.41    0.11
  -9  -7  -9    8.54    0.16
  -9  -7  -8   13.52    0.26
  -9  -7  -7   10.87    0.17
  -9  -7  -6    4.02    0.09
  -9  -7  -5   23.89    0.33
  -9  -7  -4    4.00    0.09
  -9  -7  -3    2.70    0.07
  -9  -7  -2    7.57    0.13
  -9  -7  -1    7.61    0.14
  -9  -5 -19    2.01    0.10
  -9  -5 -18    4.84    0.12
  -9  -5 -17   18.50    0.25
  -9  -5 -16    7.45    0.11
  -9  -5 -15    1.25    0.07
  -9  -5 -14    0.09    0.03
  -9  -5 -13    6.59    0.11
  -9  -5 -12    6.33    0.11
  -9  -5 -11   60.86    0.63
  -9  -5 -10    3.32    0.07
  -9  -5  -9    8.08    0.09
  -9  -5  -8   11.48    0.13
  -9  -5  -7   57.43    0.61
  -9  -5  -6    4.72    0.07
  -9  -5  -5    8.09    0.12
  -9  -5  -4    0.97    0.04
  -9  -5  -3    7.12    0.10
  -9  -5  -2    0.63    0.03
  -9  -5  -1   11.39    0.11
  -9  -3 -22    3.41    0.12
  -9  -3 -21   26.56    0.33
  -9  -3 -20   11.21    0.16
  -9  -3 -19    1.79    0.05
  -9  -3 -18    3.40    0.06
  -9  -3 -17    8.20    0.11
  -9  -3 -16    7.50    0.08
  -9  -3 -15    5.49    0.07
  -9  -3 -14    7.54    0.08
  -9  -3 -13    5.95    0.07
  -9  -3 -12    1.88    0.04
  -9  -3 -11   33.52    0.31
  -9  -3 -10   11.63    0.10
  -9  -3  -9   11.80    0.15
  -9  -3  -8   12.16    0.15
  -9  -3  -7   10.43    0.12
  -9  -3  -6    3.76    0.07
  -9  -3  -5   44.93    0.32
  -9  -3  -4   10.68    0.11
  -9  -3  -3   79.89    0.60
  -9  -3  -2   14.22    0.13
  -9  -3  -1   10.49    0.13
  -9  -1 -23    5.91    0.13
  -9  -1 -22    1.50    0.05
  -9  -1 -21    3.64    0.07
  -9  -1 -20    4.95    0.06
  -9  -1 -19    6.51    0.08
  -9  -1 -18   12.81    0.16
  -9  -1 -17    3.60    0.05
  -9  -1 -16    1.07    0.03
  -9  -1 -15    1.79    0.05
  -9  -1 -14   12.47    0.09
  -9  -1 -13    7.77    0.07
  -9  -1 -12    6.29    0.09
  -9  -1 -11   24.71    0.18
  -9  -1 -10    6.63    0.06
  -9  -1  -9   12.77    0.10
  -9  -1  -8   10.78    0.13
  -9  -1  -7    7.98    0.08
  -9  -1  -6    6.32    0.09
  -9  -1  -5   58.57    0.44
  -9  -1  -4   15.37    0.17
  -9  -1  -3   92.33    0.74
  -9  -1  -2    8.47    0.10
  -9  -1  -1   98.21    0.64
  -8  -8 -15    1.58    0.11
  -8  -8 -14    7.99    0.28
  -8  -8 -13    5.33    0.17
  -8  -8 -12    2.67    0.11
  -8  -8 -11    0.80    0.07
  -8  -8 -10   18.43    0.33
  -8  -8  -9   25.73    0.42
  -8  -8  -8    5.76    0.13
  -8  -8  -7    0.16    0.04
  -8  -8  -6   20.14    0.34
  -8  -8  -5    6.61    0.14
  -8  -8  -4   21.76    0.36
  -8  -8  -3   22.42    0.39
  -8  -8  -2    8.13    0.16
  -8  -8  -1    2.19    0.07
  -8  -6 -21    8.71    0.18
  -8  -6 -20    2.80    0.08
  -8  -6 -19    9.89    0.17
  -8  -6 -18    0.84    0.05
  -8  -6 -17    1.58    0.05
  -8  -6 -16    0.95    0.05
  -8  -6 -15    2.46    0.05
  -8  -6 -14    8.98    0.11
  -8  -6 -13    6.40    0.10
  -8  -6 -12   10.58    0.14
  -8  -6 -11    2.32    0.06
  -8  -6 -10    1.21    0.05
  -8  -6  -9   23.34    0.26
  -8  -6  -8   19.53    0.21
  -8  -6  -7    0.46    0.04
  -8  -6  -6   16.90    0.18
  -8  -6  -5   67.51    0.59
  -8  -6  -4    0.89    0.04
  -8  -6  -3   13.39    0.13
  -8  -6  -2   30.01    0.30
  -8  -6  -1   47.78    0.51
  -8  -4 -24   20.23    0.39
  -8  -4 -23   59.61    1.04
  -8  -4 -22   11.09    0.14
  -8  -4 -21   25.51    0.29
  -8  -4 -20    7.46    0.09
  -8  -4 -19   20.37    0.18
  -8  -4 -18    7.12    0.10
  -8  -4 -17    9.94    0.10
  -8  -4 -16   22.56    0.24
  -8  -4 -15   34.57    0.36
  -8  -4 -14    1.33    0.04
  -8  -4 -13   54.47    0.56
  -8  -4 -12   54.96    0.46
  -8  -4 -11   34.68    0.32
  -8  -4 -10    9.63    0.11
  -8  -4  -9   43.78    0.34
  -8  -4  -8   32.95    0.30
  -8  -4  -7   22.51    0.24
  -8  -4  -6   71.67    0.54
  -8  -4  -5    8.93    0.08
  -8  -4  -4   23.04    0.19
  -8  -4  -3    8.64    0.12
  -8  -4  -2   12.23    0.12
  -8  -4  -1   15.18    0.17
  -8  -2 -26    0.49    0.03
  -8  -2 -25   19.57    0.23
  -8  -2 -24    6.70    0.10
  -8  -2 -23    3.11    0.05
  -8  -2 -22    1.04    0.05
  -8  -2 -21    0.90    0.05
  -8  -2 -20    2.41    0.05
  -8  -2 -19   16.34    0.14
  -8  -2 -18   30.96    0.23
  -8  -2 -17   53.48    0.44
  -8  -2 -16   43.42    0.31
  -8  -2 -15   30.29    0.23
  -8  -2 -14   27.88    0.27
  -8  -2 -13    2.72    0.05
  -8  -2 -12   27.34    0.26
  -8  -2 -11   47.55    0.38
  -8  -2 -10   19.12    0.12
  -8  -2  -9   59.48    0.48
  -8  -2  -8  150.29    0.95
  -8  -2  -7   66.02    0.47
  -8  -2  -6   25.94    0.18
  -8  -2  -5  128.78    0.82
  -8  -2  -4   79.63    0.67
  -8  -2  -3    5.68    0.07
  -8  -2  -2    2.97    0.07
  -8  -2  -1   14.96    0.16
  -7  -9 -16    4.24    0.17
  -7  -9 -15   11.61    0.35
  -7  -9 -14    7.38    0.32
  -7  -9 -13    5.00    0.16
  -7  -9 -12    3.67    0.11
  -7  -9 -11   12.04    0.26
  -7  -9 -10   47.76    0.91
  -7  -9  -9    4.53    0.15
  -7  -9  -8   12.56    0.26
  -7  -9  -7    6.47    0.15
  -7  -9  -6   14.61    0.28
  -7  -9  -5   11.92    0.23
  -7  -9  -4    2.41    0.12
  -7  -9  -3    5.11    0.16
  -7  -9  -2    8.02    0.20
  -7  -9  -1    4.38    0.13
  -7  -7 -22   21.94    0.68
  -7  -7 -21    2.77    0.09
  -7  -7 -20   16.76    0.26
  -7  -7 -19    2.52    0.06
  -7  -7 -18    8.13    0.14
  -7  -7 -17   11.30    0.17
  -7  -7 -16    1.44    0.06
  -7  -7 -15    3.22    0.06
  -7  -7 -14   10.20    0.13
  -7  -7 -13    9.25    0.14
  -7  -7 -12   29.12    0.36
  -7  -7 -11   29.20    0.35
  -7  -7 -10   27.87    0.36
  -7  -7  -9    7.51    0.12
  -7  -7  -8    3.83    0.08
  -7  -7  -7   56.19    0.70
  -7  -7  -6    6.77    0.11
  -7  -7  -5    2.49    0.07
  -7  -7  -4   36.83    0.45
  -7  -7  -3    4.57    0.09
  -7  -7  -2   18.63    0.23
  -7  -7  -1   10.21    0.13
  -7  -5 -26    2.63    0.09
  -7  -5 -25    4.35    0.09
  -7  -5 -24    0.41    0.03
  -7  -5 -23   35.61    0.42
  -7  -5 -22   19.41    0.26
  -7  -5 -21   10.16    0.12
  -7  -5 -20   19.73    0.22
  -7  -5 -19   30.85    0.27
  -7  -5 -18   20.69    0.20
  -7  -5 -17   53.36    0.56
  -7  -5 -16   15.85    0.16
  -7  -5 -15   25.85    0.23
  -7  -5 -14   24.01    0.25
  -7  -5 -13    6.81    0.09
  -7  -5 -12   16.98    0.16
  -7  -5 -11   10.74    0.12
  -7  -5 -10    6.46    0.07
  -7  -5  -9   20.76    0.18
  -7  -5  -8   27.81    0.26
  -7  -5  -7   56.17    0.55
  -7  -5  -6    2.91    0.08
  -7  -5  -5   46.38    0.36
  -7  -5  -4   18.83    0.20
  -7  -5  -3   12.20    0.12
  -7  -5  -2    4.06    0.06
  -7  -5  -1    4.64    0.08
  -7  -3 -28    3.08    0.11
  -7  -3 -27    2.29    0.05
  -7  -3 -26    6.10    0.09
  -7  -3 -25    0.29    0.03
  -7  -3 -24   19.84    0.23
  -7  -3 -23    1.74    0.04
  -7  -3 -22   12.15    0.11
  -7  -3 -21    5.11    0.08
  -7  -3 -20    1.82    0.04
  -7  -3 -19    9.10    0.12
  -7  -3 -18   27.03    0.29
  -7  -3 -17    6.14    0.09
  -7  -3 -16    6.29    0.08
  -7  -3 -15    2.29    0.05
  -7  -3 -14   13.87    0.12
  -7  -3 -13   18.86    0.15
  -7  -3 -12   47.21    0.36
  -7  -3 -11  127.68    0.91
  -7  -3 -10  115.35    0.97
  -7  -3  -9   53.55    0.44
  -7  -3  -8   27.15    0.20
  -7  -3  -7   59.57    0.51
  -7  -3  -6   17.14    0.12
  -7  -3  -5    6.88    0.09
  -7  -3  -4   15.38    0.18
  -7  -3  -3   22.99    0.22
  -7  -3  -2   70.37    0.55
  -7  -3  -1   39.79    0.29
  -7  -1 -29    0.62    0.05
  -7  -1 -28    2.56    0.06
  -7  -1 -27    1.95    0.04
  -7  -1 -26    6.55    0.10
  -7  -1 -25    1.74    0.05
  -7  -1 -24    6.21    0.07
  -7  -1 -23    1.52    0.04
  -7  -1 -22    1.64    0.03
  -7  -1 -21    0.60    0.03
  -7  -1 -20    3.86    0.05
  -7  -1 -19   16.71    0.14
  -7  -1 -18   23.61    0.21
  -7  -1 -17   16.46    0.14
  -7  -1 -16   12.26    0.09
  -7  -1 -15    6.38    0.07
  -7  -1 -14    1.18    0.04
  -7  -1 -13   47.54    0.38
  -7  -1 -12    3.74    0.05
  -7  -1 -11    1.00    0.03
  -7  -1 -10   50.58    0.34
  -7  -1  -9   17.52    0.14
  -7  -1  -8   25.86    0.20
  -7  -1  -7    1.74    0.03
  -7  -1  -6   30.03    0.28
  -7  -1  -5    6.95    0.06
  -7  -1  -4   26.99    0.25
  -7  -1  -3   17.59    0.15
  -7  -1  -2   72.52    0.42
  -7  -1  -1   22.54    0.19
  -6 -10 -16    3.09    0.30
  -6 -10 -15    3.60    0.16
  -6 -10 -14   13.59    0.47
  -6 -10 -13    4.49    0.26
  -6 -10 -12   19.44    0.49
  -6 -10 -11    4.02    0.13
  -6 -10 -10    2.74    0.12
  -6 -10  -9    7.38    0.20
  -6 -10  -8    1.50    0.08
  -6 -10  -7    5.28    0.20
  -6 -10  -6    8.04    0.32
  -6 -10  -5    0.19    0.07
  -6 -10  -4    1.63    0.15
  -6 -10  -3    1.92    0.12
  -6 -10  -2    8.29    0.26
  -6 -10  -1    7.84    0.20
  -6  -8 -22   18.22    0.51
  -6  -8 -21    5.95    0.14
  -6  -8 -20   14.67    0.26
  -6  -8 -19    1.23    0.07
  -6  -8 -18    3.22    0.08
  -6  -8 -17    5.39    0.11
  -6  -8 -16    2.07    0.07
  -6  -8 -15    1.35    0.06
  -6  -8 -14    8.71    0.14
  -6  -8 -13    0.32    0.07
  -6  -8 -12   24.81    0.32
  -6  -8 -11    3.39    0.10
  -6  -8 -10   20.69    0.25
  -6  -8  -9    3.41    0.07
  -6  -8  -8   42.99    0.57
  -6  -8  -7   12.49    0.16
  -6  -8  -6   38.30    0.56
  -6  -8  -5    1.03    0.04
  -6  -8  -4   47.07    0.74
  -6  -8  -3   34.91    0.67
  -6  -8  -2   10.46    0.21
  -6  -8  -1    8.31    0.25
  -6  -6 -27    3.19    0.11
  -6  -6 -26   17.03    0.26
  -6  -6 -25   12.25    0.15
  -6  -6 -24   14.49    0.17
  -6  -6 -23   17.75    0.24
  -6  -6 -22   11.86    0.15
  -6  -6 -21    9.30    0.14
  -6  -6 -20    2.37    0.06
  -6  -6 -19   11.89    0.13
  -6  -6 -18    4.38    0.07
  -6  -6 -17   71.97    0.76
  -6  -6 -16   83.43    0.85
  -6  -6 -15   17.83    0.20
  -6  -6 -14   87.75    0.83
  -6  -6 -13   53.22    0.52
  -6  -6 -12    1.65    0.06
  -6  -6 -11   50.79    0.45
  -6  -6 -10    3.50    0.07
  -6  -6  -9   37.30    0.43
  -6  -6  -8   17.97    0.25
  -6  -6  -7   20.06    0.28
  -6  -6  -6    1.89    0.06
  -6  -6  -5   21.24    0.23
  -6  -6  -4   28.66    0.23
  -6  -6  -2   17.58    0.14
  -6  -6  -1    3.44    0.07
  -6  -4 -29    3.14    0.10
  -6  -4 -28    1.36    0.06
  -6  -4 -27    6.52    0.10
  -6  -4 -26    5.84    0.08
  -6  -4 -25    7.22    0.09
  -6  -4 -24    9.59    0.12
  -6  -4 -23   10.05    0.10
  -6  -4 -22    3.39    0.06
  -6  -4 -21   17.66    0.15
  -6  -4 -20   16.89    0.20
  -6  -4 -19   60.53    0.54
  -6  -4 -18    6.96    0.09
  -6  -4 -17    9.71    0.11
  -6  -4 -16   34.93    0.27
  -6  -4 -15    2.24    0.05
  -6  -4 -14   96.50    0.78
  -6  -4 -13   58.92    0.50
  -6  -4 -12   71.23    0.50
  -6  -4 -11  102.97    0.81
  -6  -4 -10    8.71    0.11
  -6  -4  -9   16.04    0.14
  -6  -4  -8    4.16    0.05
  -6  -4  -7   25.94    0.23
  -6  -4  -6    7.03    0.13
  -6  -4  -5   27.88    0.23
  -6  -4  -4   15.64    0.22
  -6  -4  -3   35.52    0.31
  -6  -4  -2   20.39    0.26
  -6  -4  -1   39.24    0.35
  -6  -2 -31    2.34    0.34
  -6  -2 -30    3.73    0.06
  -6  -2 -29    0.39    0.03
  -6  -2 -28    2.23    0.05
  -6  -2 -27   12.01    0.14
  -6  -2 -26   29.38    0.25
  -6  -2 -25   15.62    0.16
  -6  -2 -24   15.04    0.15
  -6  -2 -23    4.03    0.06
  -6  -2 -22    2.38    0.04
  -6  -2 -21    9.58    0.09
  -6  -2 -20    6.02    0.08
  -6  -2 -19   25.63    0.20
  -6  -2 -18   56.11    0.46
  -6  -2 -17   28.19    0.20
  -6  -2 -16   60.53    0.45
  -6  -2 -15    8.90    0.08
  -6  -2 -14    3.39    0.05
  -6  -2 -13    6.45    0.07
  -6  -2 -12   10.01    0.11
  -6  -2 -11   34.39    0.24
  -6  -2 -10    8.85    0.09
  -6  -2  -8    7.97    0.07
  -6  -2  -7   45.48    0.32
  -6  -2  -6   66.55    0.57
  -6  -2  -5   55.93    0.46
  -6  -2  -4   65.53    0.56
  -6  -2  -3   50.70    0.41
  -6  -2  -2   48.27    0.42
  -6  -2  -1    6.24    0.08
  -5 -11 -14    6.56    1.06
  -5 -11 -13    3.77    0.20
  -5 -11 -12    7.82    0.27
  -5 -11 -11    5.85    0.25
  -5 -11 -10   16.78    0.46
  -5 -11  -9    4.14    0.25
  -5 -11  -8    2.83    0.15
  -5 -11  -7    7.50    0.27
  -5 -11  -6    7.79    0.29
  -5 -11  -5    2.00    0.24
  -5 -11  -4    1.67    0.10
  -5 -11  -3    2.02    0.10
  -5 -11  -2    4.76    0.19
  -5 -11  -1   14.05    0.49
  -5  -9 -22    4.08    0.15
  -5  -9 -21    2.09    0.19
  -5  -9 -20    1.82    0.12
  -5  -9 -19    0.77    0.07
  -5  -9 -18    6.54    0.13
  -5  -9 -17    1.38    0.04
  -5  -9 -16   24.61    0.36
  -5  -9 -15    5.18    0.08
  -5  -9 -14    1.95    0.07
  -5  -9 -13   21.63    0.41
  -5  -9 -12   17.81    0.29
  -5  -9 -11    3.45    0.09
  -5  -9 -10   36.73    0.61
  -5  -9  -9   30.30    0.53
  -5  -9  -8    1.73    0.08
  -5  -9  -7   17.43    0.29
  -5  -9  -6   34.40    0.60
  -5  -9  -5  101.80    2.00
  -5  -9  -4    5.44    0.15
  -5  -9  -3   15.93    0.31
  -5  -9  -2    6.59    0.15
  -5  -9  -1   61.00    1.10
  -5  -7 -27    8.63    0.33
  -5  -7 -26    5.02    0.10
  -5  -7 -25    5.65    0.11
  -5  -7 -24    0.85    0.04
  -5  -7 -23    4.15    0.10
  -5  -7 -22    0.81    0.05
  -5  -7 -21    8.08    0.09
  -5  -7 -20    3.34    0.09
  -5  -7 -19   31.07    0.36
  -5  -7 -18    6.94    0.08
  -5  -7 -17    7.21    0.15
  -5  -7 -16   24.72    0.34
  -5  -7 -15   40.23    0.40
  -5  -7 -14   39.59    0.53
  -5  -7 -13   65.98    0.64
  -5  -7 -12   75.60    0.72
  -5  -7 -11   52.88    0.64
  -5  -7 -10   26.57    0.34
  -5  -7  -9   42.83    0.67
  -5  -7  -8   31.51    0.43
  -5  -7  -7   25.93    0.29
  -5  -7  -6   12.28    0.26
  -5  -7  -5   20.10    0.21
  -5  -7  -4   24.52    0.41
  -5  -7  -3   31.25    0.41
  -5  -7  -2    1.09    0.11
  -5  -7  -1   29.65    0.58
  -5  -5 -30   10.73    0.26
  -5  -5 -29    3.83    0.08
  -5  -5 -28    2.52    0.07
  -5  -5 -27    5.79    0.09
  -5  -5 -26   12.58    0.12
  -5  -5 -25   19.88    0.26
  -5  -5 -24    1.44    0.04
  -5  -5 -23   15.58    0.18
  -5  -5 -22    8.36    0.12
  -5  -5 -21   37.91    0.35
  -5  -5 -20   11.64    0.14
  -5  -5 -19    8.33    0.11
  -5  -5 -18  119.08    1.08
  -5  -5 -17  232.51    2.03
  -5  -5 -16  118.57    1.08
  -5  -5 -15  119.60    1.06
  -5  -5 -14  173.05    1.36
  -5  -5 -13   18.68    0.19
  -5  -5 -12   34.49    0.33
  -5  -5 -11    2.41    0.05
  -5  -5 -10   88.38    0.85
  -5  -5  -9   35.56    0.36
  -5  -5  -8    7.32    0.19
  -5  -5  -7   27.84    0.30
  -5  -5  -6   11.65    0.26
  -5  -5  -5   28.66    0.28
  -5  -5  -4   30.96    0.33
  -5  -5  -3   58.54    0.55
  -5  -5  -2   89.25    0.88
  -5  -5  -1   29.77    0.30
  -5  -3 -32   19.04    0.37
  -5  -3 -31    8.11    0.11
  -5  -3 -30    7.74    0.09
  -5  -3 -29    8.02    0.10
  -5  -3 -28   23.43    0.22
  -5  -3 -27   15.19    0.12
  -5  -3 -26    6.92    0.10
  -5  -3 -25    8.68    0.08
  -5  -3 -24   20.41    0.19
  -5  -3 -23    8.06    0.07
  -5  -3 -22   18.38    0.14
  -5  -3 -21    7.36    0.10
  -5  -3 -20    5.87    0.08
  -5  -3 -19   37.31    0.32
  -5  -3 -18   19.64    0.14
  -5  -3 -17   24.55    0.19
  -5  -3 -16   12.17    0.10
  -5  -3 -15   30.05    0.32
  -5  -3 -14   14.42    0.11
  -5  -3 -13   56.35    0.52
  -5  -3 -12   45.80    0.47
  -5  -3 -11   13.41    0.54
  -5  -3 -10   22.78    0.18
  -5  -3  -9    3.19    0.03
  -5  -3  -8    4.31    0.11
  -5  -3  -7    7.26    0.06
  -5  -3  -6    7.09    0.18
  -5  -3  -5   45.65    0.63
  -5  -3  -4  170.79    1.93
  -5  -3  -3   45.44    0.80
  -5  -3  -2   10.53    0.09
  -5  -3  -1  128.49    1.33
  -5  -1 -33    2.18    0.08
  -5  -1 -32    1.91    0.04
  -5  -1 -31   10.10    0.11
  -5  -1 -30   10.14    0.12
  -5  -1 -29    7.61    0.09
  -5  -1 -28    0.05    0.02
  -5  -1 -27   38.35    0.34
  -5  -1 -26   13.34    0.12
  -5  -1 -25    2.20    0.05
  -5  -1 -24   14.60    0.13
  -5  -1 -23   20.01    0.15
  -5  -1 -22   17.96    0.15
  -5  -1 -21   29.29    0.21
  -5  -1 -20   13.76    0.12
  -5  -1 -19    7.51    0.08
  -5  -1 -18    5.75    0.07
  -5  -1 -17   20.94    0.18
  -5  -1 -16   48.50    0.36
  -5  -1 -15   22.98    0.18
  -5  -1 -14   20.51    0.17
  -5  -1 -13   31.78    0.20
  -5  -1 -12   24.61    0.24
  -5  -1 -11   94.09    0.80
  -5  -1 -10   88.33    0.77
  -5  -1  -9   30.00    0.24
  -5  -1  -8   22.10    0.25
  -5  -1  -7  136.15    1.46
  -5  -1  -6   23.24    0.23
  -5  -1  -5   30.31    0.29
  -5  -1  -4    8.52    0.13
  -5  -1  -3  176.19    2.08
  -5  -1  -2   32.72    0.41
  -5  -1  -1  107.10    1.38
  -4 -12 -11    4.53    0.40
  -4 -12 -10   18.67    0.70
  -4 -12  -9   13.12    0.96
  -4 -12  -8    7.05    0.90
  -4 -12  -7    5.60    0.73
  -4 -12  -6    3.14    0.60
  -4 -12  -4   36.00    2.56
  -4 -12  -3    6.23    0.57
  -4 -12  -2    4.92    0.55
  -4 -12  -1    5.36    0.64
  -4 -10 -21   37.03    1.04
  -4 -10 -20    5.52    0.26
  -4 -10 -19    3.24    0.25
  -4 -10 -18   11.74    0.31
  -4 -10 -17    0.91    0.09
  -4 -10 -16   15.04    0.31
  -4 -10 -15   13.44    0.35
  -4 -10 -14    7.54    0.19
  -4 -10 -13    0.07    0.05
  -4 -10 -12    5.42    0.18
  -4 -10 -11   29.39    0.71
  -4 -10 -10    0.71    0.05
  -4 -10  -9    7.71    0.26
  -4 -10  -8   34.80    0.76
  -4 -10  -7   46.45    0.86
  -4 -10  -6   26.43    0.63
  -4 -10  -5    8.18    0.19
  -4 -10  -4   45.39    0.99
  -4 -10  -3    5.26    0.23
  -4 -10  -2    1.15    0.08
  -4 -10  -1   39.94    1.15
  -4  -8 -26   11.07    0.30
  -4  -8 -25    1.68    0.13
  -4  -8 -24    2.56    0.09
  -4  -8 -23   22.38    0.32
  -4  -8 -22   19.56    0.29
  -4  -8 -21   23.77    0.29
  -4  -8 -20    8.13    0.12
  -4  -8 -19   11.18    0.22
  -4  -8 -18    3.35    0.08
  -4  -8 -17    0.93    0.07
  -4  -8 -16   13.47    0.22
  -4  -8 -15   14.51    0.29
  -4  -8 -14   15.82    0.19
  -4  -8 -13   14.21    0.19
  -4  -8 -12   16.13    0.28
  -4  -8 -11   29.37    0.54
  -4  -8 -10  101.27    1.54
  -4  -8  -9   76.31    0.89
  -4  -8  -8   56.08    0.85
  -4  -8  -7   71.66    1.05
  -4  -8  -6  169.21    2.33
  -4  -8  -5   49.26    0.93
  -4  -8  -4  184.91    2.62
  -4  -8  -3    9.51    0.15
  -4  -8  -2   23.76    0.54
  -4  -8  -1   20.35    0.48
  -4  -6 -30    4.17    0.10
  -4  -6 -29   10.21    0.16
  -4  -6 -28    3.72    0.08
  -4  -6 -27    3.41    0.07
  -4  -6 -26    0.85    0.05
  -4  -6 -25   13.47    0.18
  -4  -6 -24    1.74    0.08
  -4  -6 -23    5.56    0.07
  -4  -6 -22   53.47    0.69
  -4  -6 -21   42.66    0.42
  -4  -6 -20   27.04    0.35
  -4  -6 -19   27.50    0.27
  -4  -6 -18  187.31    1.60
  -4  -6 -17   56.13    0.63
  -4  -6 -16    7.15    0.09
  -4  -6 -15  212.76    2.35
  -4  -6 -14  170.35    2.04
  -4  -6 -13    2.92    0.06
  -4  -6 -12   50.49    0.69
  -4  -6 -11   29.03    0.28
  -4  -6 -10   96.00    0.77
  -4  -6  -9  108.91    1.05
  -4  -6  -8   24.71    0.18
  -4  -6  -7   20.33    0.34
  -4  -6  -6   26.29    0.56
  -4  -6  -5    7.53    0.15
  -4  -6  -4   89.31    1.38
  -4  -6  -3   11.08    0.22
  -4  -6  -2   37.92    0.91
  -4  -6  -1    7.93    0.12
  -4  -4 -32   23.62    0.34
  -4  -4 -31   15.35    0.18
  -4  -4 -30    1.22    0.03
  -4  -4 -29   51.53    0.45
  -4  -4 -28    4.43    0.08
  -4  -4 -27    6.80    0.07
  -4  -4 -26   13.42    0.18
  -4  -4 -25   15.65    0.19
  -4  -4 -24    6.87    0.12
  -4  -4 -23   38.64    0.40
  -4  -4 -22   97.52    0.72
  -4  -4 -21   60.48    0.56
  -4  -4 -20  160.85    1.19
  -4  -4 -19   87.48    0.65
  -4  -4 -18   90.73    0.92
  -4  -4 -17   37.62    0.27
  -4  -4 -16   69.81    0.69
  -4  -4 -15   50.41    0.37
  -4  -4 -14    1.88    0.07
  -4  -4 -13  149.75    1.36
  -4  -4 -12   32.87    0.41
  -4  -4 -11   58.69    0.53
  -4  -4 -10   63.00    0.85
  -4  -4  -9   81.49    0.82
  -4  -4  -8   88.45    0.80
  -4  -4  -7   28.75    0.34
  -4  -4  -6   78.32    0.63
  -4  -4  -5   62.14    0.75
  -4  -4  -4   44.27    0.44
  -4  -4  -3    1.88    0.13
  -4  -4  -2  436.74    5.28
  -4  -4  -1   36.15    0.32
  -4  -2 -34   19.22    0.41
  -4  -2 -33   10.69    0.12
  -4  -2 -32    7.11    0.09
  -4  -2 -31    2.95    0.07
  -4  -2 -30   27.77    0.30
  -4  -2 -29    1.48    0.05
  -4  -2 -28    6.57    0.08
  -4  -2 -27   20.84    0.22
  -4  -2 -26    4.46    0.05
  -4  -2 -25   29.69    0.20
  -4  -2 -24   27.38    0.21
  -4  -2 -23    2.60    0.06
  -4  -2 -22   12.33    0.11
  -4  -2 -21   25.97    0.24
  -4  -2 -20    4.28    0.05
  -4  -2 -19   20.35    0.16
  -4  -2 -18    3.44    0.04
  -4  -2 -17   38.11    0.35
  -4  -2 -16   28.77    0.22
  -4  -2 -15   67.93    0.45
  -4  -2 -14   92.83    0.81
  -4  -2 -13   28.33    0.31
  -4  -2 -12   19.89    0.19
  -4  -2 -11   11.30    0.21
  -4  -2 -10   23.84    0.25
  -4  -2  -9  265.73    3.41
  -4  -2  -8  123.81    1.17
  -4  -2  -7  232.60    2.71
  -4  -2  -6  217.92    2.24
  -4  -2  -5  175.44    1.46
  -4  -2  -4  159.68    1.95
  -4  -2  -3   35.53    0.60
  -4  -2  -2   12.61    0.19
  -4  -2  -1   62.88    1.07
  -3 -11 -19    1.92    0.30
  -3 -11 -18   32.01    0.93
  -3 -11 -17    1.09    0.32
  -3 -11 -16   12.50    0.35
  -3 -11 -15   10.26    0.34
  -3 -11 -14   18.77    0.51
  -3 -11 -13    7.29    0.35
  -3 -11 -12   40.08    0.99
  -3 -11 -11   21.48    0.57
  -3 -11 -10    3.43    0.27
  -3 -11  -9    8.02    0.48
  -3 -11  -8    1.99    0.15
  -3 -11  -7   21.59    0.71
  -3 -11  -6   10.12    0.47
  -3 -11  -5    2.77    0.19
  -3 -11  -4   18.68    1.10
  -3 -11  -3   12.26    1.04
  -3 -11  -2   12.62    1.04
  -3 -11  -1   20.81    3.10
  -3  -9 -25   10.85    0.42
  -3  -9 -24   19.69    0.40
  -3  -9 -23   14.79    0.28
  -3  -9 -22    6.97    0.14
  -3  -9 -21    5.54    0.12
  -3  -9 -20    2.00    0.07
  -3  -9 -19    4.33    0.10
  -3  -9 -18    5.51    0.13
  -3  -9 -17    7.39    0.12
  -3  -9 -16    8.96    0.19
  -3  -9 -15   10.07    0.13
  -3  -9 -14   14.46    0.30
  -3  -9 -13   16.35    0.23
  -3  -9 -12    7.69    0.17
  -3  -9 -11   23.43    0.66
  -3  -9 -10   13.65    0.28
  -3  -9  -9   31.52    0.43
  -3  -9  -8   27.61    0.47
  -3  -9  -7   62.26    1.28
  -3  -9  -6   73.40    1.40
  -3  -9  -5   27.36    0.66
  -3  -9  -4   38.79    0.87
  -3  -9  -3   55.26    1.07
  -3  -9  -2   23.45    0.43
  -3  -9  -1    1.31    0.09
  -3  -7 -30    2.29    0.17
  -3  -7 -29    1.43    0.06
  -3  -7 -28   12.55    0.20
  -3  -7 -27    7.66    0.11
  -3  -7 -26    2.00    0.06
  -3  -7 -25    6.93    0.13
  -3  -7 -24   29.10    0.29
  -3  -7 -23   43.50    0.43
  -3  -7 -22   37.69    0.45
  -3  -7 -21   50.17    0.61
  -3  -7 -20    3.00    0.10
  -3  -7 -19   52.35    0.65
  -3  -7 -18    4.52    0.13
  -3  -7 -17   17.42    0.18
  -3  -7 -16    2.95    0.10
  -3  -7 -15   18.23    0.25
  -3  -7 -14    3.37    0.07
  -3  -7 -13   19.10    0.21
  -3  -7 -12   47.20    0.48
  -3  -7 -11   69.69    0.96
  -3  -7 -10   61.75    0.72
  -3  -7  -9  125.34    2.12
  -3  -7  -8   35.61    0.72
  -3  -7  -7    1.93    0.07
  -3  -7  -6   33.08    0.60
  -3  -7  -5   13.79    0.28
  -3  -7  -4   19.02    0.44
  -3  -7  -3  100.89    1.20
  -3  -7  -2   55.80    0.66
  -3  -7  -1   38.72    0.65
  -3  -5 -32    8.61    0.14
  -3  -5 -31    2.78    0.06
  -3  -5 -30   25.10    0.29
  -3  -5 -29   17.78    0.20
  -3  -5 -28   19.53    0.21
  -3  -5 -27   13.86    0.15
  -3  -5 -26    4.55    0.09
  -3  -5 -25   52.67    0.52
  -3  -5 -24    1.18    0.05
  -3  -5 -23    1.05    0.04
  -3  -5 -22   31.87    0.29
  -3  -5 -21   65.55    0.55
  -3  -5 -20   22.72    0.22
  -3  -5 -19   64.90    0.59
  -3  -5 -18   55.60    0.52
  -3  -5 -17   38.64    0.38
  -3  -5 -16   36.77    0.30
  -3  -5 -15   30.00    0.32
  -3  -5 -14   10.18    0.18
  -3  -5 -13   37.74    0.40
  -3  -5 -12   10.10    0.22
  -3  -5 -11    3.50    0.07
  -3  -5 -10   94.31    1.33
  -3  -5  -9    1.09    0.04
  -3  -5  -8   28.35    0.54
  -3  -5  -7   73.36    1.26
  -3  -5  -6   12.57    0.16
  -3  -5  -5   64.76    0.78
  -3  -5  -4   19.76    0.17
  -3  -5  -3   65.40    0.86
  -3  -5  -2   19.40    0.25
  -3  -5  -1   67.98    0.92
  -3  -3 -34   12.34    0.15
  -3  -3 -33    1.04    0.04
  -3  -3 -32    9.89    0.13
  -3  -3 -31   13.52    0.16
  -3  -3 -30    1.22    0.04
  -3  -3 -29   32.71    0.33
  -3  -3 -28    7.54    0.08
  -3  -3 -27   34.49    0.32
  -3  -3 -26    5.62    0.07
  -3  -3 -25   27.98    0.21
  -3  -3 -24   36.05    0.31
  -3  -3 -23   57.73    0.43
  -3  -3 -22   11.83    0.14
  -3  -3 -21    4.88    0.06
  -3  -3 -20   55.33    0.41
  -3  -3 -19   15.93    0.14
  -3  -3 -18   41.56    0.38
  -3  -3 -17   94.70    0.81
  -3  -3 -16    7.10    0.08
  -3  -3 -15   19.88    0.16
  -3  -3 -14  114.18    1.08
  -3  -3 -13    9.12    0.10
  -3  -3 -12    9.62    0.26
  -3  -3 -11  267.85    2.80
  -3  -3 -10  154.53    1.77
  -3  -3  -9  278.72    3.19
  -3  -3  -8   12.73    0.22
  -3  -3  -7  162.91    2.33
  -3  -3  -6   94.03    1.27
  -3  -3  -5  161.15    1.94
  -3  -3  -4   14.85    0.24
  -3  -3  -3  128.65    1.57
  -3  -3  -2   32.34    0.37
  -3  -3  -1   29.00    0.32
  -3  -1 -35   27.42    0.39
  -3  -1 -34    3.54    0.06
  -3  -1 -33    6.24    0.08
  -3  -1 -32    4.55    0.06
  -3  -1 -31   12.70    0.13
  -3  -1 -30   28.65    0.25
  -3  -1 -29   15.69    0.15
  -3  -1 -27   42.39    0.33
  -3  -1 -26    2.97    0.05
  -3  -1 -25   46.13    0.36
  -3  -1 -24    2.82    0.05
  -3  -1 -23   29.44    0.23
  -3  -1 -22   21.98    0.19
  -3  -1 -20   17.50    0.15
  -3  -1 -19    8.76    0.07
  -3  -1 -18   69.77    0.52
  -3  -1 -17    3.96    0.06
  -3  -1 -16  104.11    0.93
  -3  -1 -15  177.77    1.79
  -3  -1 -14   70.04    0.74
  -3  -1 -13   61.07    0.79
  -3  -1 -12   86.10    1.02
  -3  -1 -11   14.98    0.21
  -3  -1 -10   52.70    0.74
  -3  -1  -9  580.85    7.74
  -3  -1  -8   49.59    0.75
  -3  -1  -7  143.15    1.44
  -3  -1  -6  109.03    1.19
  -3  -1  -5   45.38    0.53
  -3  -1  -4  108.70    1.41
  -3  -1  -3   18.80    0.23
  -3  -1  -2  208.65    2.59
  -3  -1  -1  153.81    1.69
  -2 -12 -16    3.77    0.62
  -2 -12 -15   16.73    0.62
  -2 -12 -14    6.89    0.59
  -2 -12 -13    2.10    0.52
  -2 -12 -12    0.24    0.13
  -2 -12 -11    7.66    0.65
  -2 -12 -10    1.29    0.20
  -2 -12  -9   21.68    0.84
  -2 -12  -8   31.21    1.14
  -2 -12  -7   16.17    1.26
  -2 -12  -6    4.22    0.75
  -2 -12  -1   17.56    1.54
  -2 -10 -23    5.16    0.32
  -2 -10 -22    1.00    0.10
  -2 -10 -21    0.51    0.06
  -2 -10 -20    3.53    0.23
  -2 -10 -19   28.09    0.75
  -2 -10 -18    6.80    0.36
  -2 -10 -17    0.53    0.12
  -2 -10 -16   25.75    0.52
  -2 -10 -15    5.92    0.30
  -2 -10 -14   28.13    0.62
  -2 -10 -13    6.14    0.22
  -2 -10 -12    1.35    0.17
  -2 -10 -11   18.21    0.39
  -2 -10 -10   10.69    0.36
  -2 -10  -9   37.41    1.00
  -2 -10  -8   31.29    0.84
  -2 -10  -7   26.93    0.69
  -2 -10  -5    2.05    0.12
  -2 -10  -4   38.90    0.86
  -2 -10  -3   67.96    1.20
  -2 -10  -2   17.07    0.28
  -2 -10  -1   46.79    0.87
  -2  -8 -29    9.72    0.36
  -2  -8 -28    3.61    0.12
  -2  -8 -27   11.52    0.25
  -2  -8 -26    1.42    0.08
  -2  -8 -25   14.79    0.23
  -2  -8 -24   14.93    0.21
  -2  -8 -23   20.35    0.27
  -2  -8 -22   20.37    0.30
  -2  -8 -21   50.99    0.67
  -2  -8 -20   30.55    0.47
  -2  -8 -19    3.08    0.08
  -2  -8 -18   11.92    0.23
  -2  -8 -17   24.53    0.35
  -2  -8 -16    9.11    0.14
  -2  -8 -15    5.97    0.11
  -2  -8 -14    0.17    0.05
  -2  -8 -13    3.68    0.10
  -2  -8 -12    4.44    0.12
  -2  -8 -11   22.36    0.33
  -2  -8 -10    4.22    0.08
  -2  -8  -9   27.73    0.47
  -2  -8  -8  103.63    1.46
  -2  -8  -7  103.79    1.44
  -2  -8  -6   33.46    0.66
  -2  -8  -5   35.80    0.59
  -2  -8  -4   24.10    0.46
  -2  -8  -3   36.77    0.60
  -2  -8  -2    7.14    0.11
  -2  -8  -1   12.29    0.22
  -2  -6 -32    2.12    0.07
  -2  -6 -31    4.89    0.11
  -2  -6 -30    6.00    0.11
  -2  -6 -29    4.67    0.08
  -2  -6 -28    3.90    0.08
  -2  -6 -27    1.66    0.05
  -2  -6 -26   15.59    0.18
  -2  -6 -25    3.47    0.07
  -2  -6 -24   14.48    0.21
  -2  -6 -23    3.17    0.06
  -2  -6 -22    4.57    0.08
  -2  -6 -21   13.40    0.16
  -2  -6 -20   10.69    0.12
  -2  -6 -19    2.82    0.07
  -2  -6 -18   10.90    0.15
  -2  -6 -17   19.65    0.23
  -2  -6 -16   25.22    0.26
  -2  -6 -15   18.46    0.23
  -2  -6 -14   48.70    0.50
  -2  -6 -13   16.25    0.20
  -2  -6 -12   25.07    0.31
  -2  -6 -11    5.55    0.12
  -2  -6 -10   20.58    0.32
  -2  -6  -9   14.85    0.25
  -2  -6  -8   46.86    0.57
  -2  -6  -7   75.94    1.01
  -2  -6  -6   17.70    0.30
  -2  -6  -5  168.01    2.81
  -2  -6  -4    4.41    0.13
  -2  -6  -3   63.91    0.91
  -2  -6  -2  158.62    3.34
  -2  -6  -1   86.88    1.57
  -2  -4 -34   28.12    0.45
  -2  -4 -33   10.67    0.15
  -2  -4 -32   42.48    0.48
  -2  -4 -31    2.46    0.05
  -2  -4 -30   13.02    0.13
  -2  -4 -29    7.64    0.08
  -2  -4 -28   67.92    0.56
  -2  -4 -27   12.24    0.14
  -2  -4 -26    9.20    0.09
  -2  -4 -25   42.33    0.38
  -2  -4 -24   79.71    0.71
  -2  -4 -23   86.21    0.75
  -2  -4 -22   13.86    0.12
  -2  -4 -21   56.95    0.51
  -2  -4 -20  114.23    1.00
  -2  -4 -19    2.95    0.05
  -2  -4 -18    9.92    0.11
  -2  -4 -17   15.45    0.13
  -2  -4 -16   24.34    0.33
  -2  -4 -15   10.59    0.13
  -2  -4 -14   34.75    0.38
  -2  -4 -13    0.80    0.05
  -2  -4 -12   11.23    0.12
  -2  -4 -11   75.21    0.85
  -2  -4 -10   19.77    0.26
  -2  -4  -9   53.22    0.93
  -2  -4  -8   91.77    1.39
  -2  -4  -7   36.32    0.39
  -2  -4  -6   87.56    1.28
  -2  -4  -5  210.43    2.61
  -2  -4  -4   81.38    0.99
  -2  -4  -3  106.69    1.11
  -2  -4  -2   13.00    0.15
  -2  -4  -1    2.98    0.05
  -2  -2 -35    2.88    0.06
  -2  -2 -34   14.66    0.18
  -2  -2 -33    2.41    0.05
  -2  -2 -32    3.34    0.06
  -2  -2 -31   15.70    0.16
  -2  -2 -30    2.84    0.06
  -2  -2 -29   43.42    0.34
  -2  -2 -28   19.98    0.21
  -2  -2 -27   27.28    0.24
  -2  -2 -26   17.83    0.13
  -2  -2 -25   46.67    0.38
  -2  -2 -24   21.10    0.21
  -2  -2 -23    5.23    0.06
  -2  -2 -22   63.13    0.44
  -2  -2 -21   26.24    0.20
  -2  -2 -20   89.08    0.70
  -2  -2 -19    7.89    0.08
  -2  -2 -18   12.53    0.10
  -2  -2 -17  131.42    1.34
  -2  -2 -16   16.92    0.24
  -2  -2 -15   98.84    1.04
  -2  -2 -14    3.77    0.06
  -2  -2 -13    3.90    0.12
  -2  -2 -12   20.52    0.15
  -2  -2 -11  103.87    1.36
  -2  -2 -10   44.80    0.70
  -2  -2  -9  596.94    6.86
  -2  -2  -8   74.64    0.58
  -2  -2  -7  515.58    5.52
  -2  -2  -6  634.38   19.72
  -2  -2  -5  478.31    8.55
  -2  -2  -4  212.62    2.19
  -2  -2  -3  390.64    4.47
  -2  -2  -2  161.26    1.85
  -2  -2  -1  119.54    1.27
  -1 -11 -20    2.33    0.45
  -1 -11 -19    5.98    0.55
  -1 -11 -18   14.94    0.74
  -1 -11 -17    4.08    0.38
  -1 -11 -16    9.15    0.38
  -1 -11 -15    1.58    0.32
  -1 -11 -14    7.37    0.33
  -1 -11 -13    0.28    0.14
  -1 -11 -12    2.39    0.39
  -1 -11 -11   15.00    0.45
  -1 -11 -10    4.23    0.45
  -1 -11  -9    6.97    0.32
  -1 -11  -8    2.83    0.36
  -1 -11  -7   12.56    0.44
  -1 -11  -6   31.09    0.82
  -1 -11  -5    7.06    0.24
  -1 -11  -4   12.99    0.55
  -1 -11  -3   22.29    1.07
  -1 -11  -2   10.14    1.08
  -1 -11  -1   92.62    2.44
  -1  -9 -27   21.79    2.00
  -1  -9 -26    2.37    0.13
  -1  -9 -25    7.79    0.21
  -1  -9 -24   10.20    0.19
  -1  -9 -23    6.24    0.13
  -1  -9 -22    9.61    0.21
  -1  -9 -21    4.29    0.11
  -1  -9 -20   15.84    0.27
  -1  -9 -19   10.03    0.19
  -1  -9 -18   34.99    0.61
  -1  -9 -17   39.34    0.61
  -1  -9 -16   19.73    0.30
  -1  -9 -15    3.03    0.10
  -1  -9 -14   17.74    0.27
  -1  -9 -13    2.47    0.08
  -1  -9 -12   18.34    0.32
  -1  -9 -11    3.04    0.08
  -1  -9 -10   45.30    0.86
  -1  -9  -9   20.93    0.43
  -1  -9  -8    3.62    0.13
  -1  -9  -7    5.18    0.17
  -1  -9  -6   40.05    0.66
  -1  -9  -5   62.18    1.07
  -1  -9  -4   13.20    0.28
  -1  -9  -3   29.19    0.45
  -1  -9  -2   39.69    0.62
  -1  -9  -1   13.16    0.24
  -1  -7 -31    8.06    0.22
  -1  -7 -30    5.39    0.11
  -1  -7 -29   20.10    0.27
  -1  -7 -28    3.27    0.08
  -1  -7 -27   12.74    0.18
  -1  -7 -26    6.26    0.11
  -1  -7 -25   37.16    0.45
  -1  -7 -24   20.38    0.25
  -1  -7 -23   22.29    0.28
  -1  -7 -22   84.65    1.00
  -1  -7 -21    5.19    0.10
  -1  -7 -20    3.57    0.08
  -1  -7 -19   11.40    0.16
  -1  -7 -18    0.30    0.03
  -1  -7 -17    6.09    0.10
  -1  -7 -16   13.04    0.18
  -1  -7 -15   29.89    0.34
  -1  -7 -14    0.82    0.05
  -1  -7 -13   24.10    0.35
  -1  -7 -12   57.91    0.66
  -1  -7 -11    1.67    0.05
  -1  -7 -10    6.71    0.13
  -1  -7  -9  150.17    2.00
  -1  -7  -8    7.84    0.18
  -1  -7  -7    2.28    0.06
  -1  -7  -6  144.34    2.00
  -1  -7  -5   52.42    0.69
  -1  -7  -4   38.65    0.64
  -1  -7  -3   59.90    0.83
  -1  -7  -2   74.66    1.17
  -1  -7  -1   60.94    1.27
  -1  -5 -34    8.25    0.17
  -1  -5 -33   22.61    0.31
  -1  -5 -32    2.72    0.06
  -1  -5 -31    1.41    0.05
  -1  -5 -30    3.33    0.06
  -1  -5 -29    7.85    0.10
  -1  -5 -28   22.37    0.25
  -1  -5 -27    5.71    0.10
  -1  -5 -26   13.28    0.15
  -1  -5 -25   50.45    0.50
  -1  -5 -24    7.82    0.10
  -1  -5 -23    1.93    0.05
  -1  -5 -22   59.76    0.65
  -1  -5 -21    7.09    0.12
  -1  -5 -20   17.04    0.20
  -1  -5 -19   14.21    0.20
  -1  -5 -18   17.05    0.21
  -1  -5 -17   12.33    0.13
  -1  -5 -16   28.66    0.30
  -1  -5 -15   16.21    0.19
  -1  -5 -14    1.49    0.05
  -1  -5 -13   24.32    0.37
  -1  -5 -12    8.82    0.15
  -1  -5 -11   93.63    1.35
  -1  -5 -10   55.46    0.66
  -1  -5  -9   12.96    0.19
  -1  -5  -8   72.75    1.15
  -1  -5  -7    5.50    0.21
  -1  -5  -6  536.70    6.94
  -1  -5  -5  142.17    2.37
  -1  -5  -4  106.60    1.30
  -1  -5  -3   63.30    0.62
  -1  -5  -2    7.35    0.16
  -1  -5  -1   74.52    0.69
  -1  -3 -35    7.03    0.10
  -1  -3 -34    0.22    0.02
  -1  -3 -33   18.73    0.20
  -1  -3 -32    7.98    0.08
  -1  -3 -31   15.81    0.14
  -1  -3 -30   15.88    0.15
  -1  -3 -29    1.36    0.03
  -1  -3 -28   13.99    0.13
  -1  -3 -27   36.93    0.37
  -1  -3 -26   28.36    0.27
  -1  -3 -25   37.06    0.35
  -1  -3 -24   10.60    0.10
  -1  -3 -23   34.10    0.21
  -1  -3 -22  165.33    1.21
  -1  -3 -21  109.01    0.83
  -1  -3 -20   65.86    0.55
  -1  -3 -19  135.22    1.10
  -1  -3 -18   21.22    0.18
  -1  -3 -17   32.58    0.46
  -1  -3 -16  183.43    1.78
  -1  -3 -15   48.00    0.36
  -1  -3 -14    0.49    0.04
  -1  -3 -13  313.07    2.96
  -1  -3 -12   79.26    0.82
  -1  -3 -11   58.91    0.79
  -1  -3 -10  278.39    3.70
  -1  -3  -9  120.31    1.54
  -1  -3  -8   28.08    0.37
  -1  -3  -7   73.42    1.11
  -1  -3  -6  390.20    4.55
  -1  -3  -5  390.01    5.31
  -1  -3  -4   86.11    1.19
  -1  -3  -3  147.13    1.90
  -1  -3  -2  333.26    3.72
  -1  -3  -1  213.57    1.76
  -1  -1 -36   34.40    0.49
  -1  -1 -35    8.24    0.09
  -1  -1 -34    9.84    0.09
  -1  -1 -33   25.43    0.24
  -1  -1 -32   21.46    0.16
  -1  -1 -31   12.66    0.13
  -1  -1 -30   81.92    0.75
  -1  -1 -29   32.63    0.27
  -1  -1 -28    0.17    0.03
  -1  -1 -27   50.24    0.38
  -1  -1 -26   19.90    0.17
  -1  -1 -25   21.71    0.21
  -1  -1 -24    6.69    0.13
  -1  -1 -23    0.67    0.02
  -1  -1 -22   17.78    0.17
  -1  -1 -21    6.29    0.07
  -1  -1 -20  106.17    0.84
  -1  -1 -19    1.45    0.04
  -1  -1 -18  112.61    0.73
  -1  -1 -17   23.65    0.19
  -1  -1 -16  111.21    1.75
  -1  -1 -15  140.49    1.69
  -1  -1 -14  200.62    2.39
  -1  -1 -13   96.52    1.21
  -1  -1 -12  211.47    1.67
  -1  -1 -11  133.02    1.84
  -1  -1 -10  207.56    2.57
  -1  -1  -9    7.62    0.06
  -1  -1  -8  295.24    4.22
  -1  -1  -7  189.95    1.83
  -1  -1  -5  175.79    2.70
  -1  -1  -4   40.96    0.13
  -1  -1  -2  502.57   15.67
   0   0   2  119.37    0.48
   0   0   8   24.98    1.61
   0   0  10  737.17   49.56
   0   0  12    6.46    0.09
   0   0  14  122.60    3.18
   0   0  16   32.58    0.18
   0   0  18    2.59    0.05
   0   0  20    0.12    0.10
   0   0  22    0.96    0.59
   0   0  24    0.02    0.07
   0   0  26  100.87    1.49
   0   0  28   59.81    0.96
   0   0  30   97.60    1.57
   0   0  32  234.73    2.42
   0   0  34   23.93    0.46
   0   0  36   19.46    0.48
   0   2   0  655.91   20.64
   0   2   1   33.94    1.88
   0   2   2  246.39    2.66
   0   2   3   16.18    1.14
   0   2   5  768.63   22.71
   0   2   6   45.54    0.19
   0   2   7  179.42    1.10
   0   2   8  459.10    3.57
   0   2   9    2.36    0.27
   0   2  10  126.30    0.81
   0   2  11   79.56    1.47
   0   2  12    9.23    0.40
   0   2  13   57.70    0.33
   0   2  14  449.89    6.50
   0   2  15   36.96    0.25
   0   2  16   89.90    1.37
   0   2  17   32.17    0.20
   0   2  18  159.46    1.21
   0   2  19   87.47    1.14
   0   2  20   13.22    0.06
   0   2  22   26.50    0.28
   0   2  23   91.50    0.53
   0   2  24   41.56    0.22
   0   2  25   23.43    0.13
   0   2  26   20.72    0.12
   0   2  27  101.74    0.90
   0   2  28  222.30    1.54
   0   2  29   53.89    0.36
   0   2  30   47.18    0.46
   0   2  31    1.02    0.05
   0   2  32   26.98    0.33
   0   2  33    3.22    0.08
   0   2  34   12.78    0.13
   0   2  35    5.60    0.07
   0   2  36    0.75    0.03
   0   4   1   57.91    2.12
   0   4   2  343.36    6.05
   0   4   3  377.26    8.25
   0   4   4   99.99    1.35
   0   4   5   50.60    1.31
   0   4   6  503.09    6.53
   0   4   7  209.54    1.47
   0   4   8  197.02    2.37
   0   4   9  308.47    2.60
   0   4  10  287.38    3.41
   0   4  11  547.31    7.77
   0   4  12   35.75    0.48
   0   4  13   18.49    0.50
   0   4  14   40.50    0.49
   0   4  15   80.79    1.25
   0   4  16   10.29    0.11
   0   4  17   10.07    0.06
   0   4  18    3.64    0.05
   0   4  19   21.70    0.13
   0   4  20   42.60    0.39
   0   4  21    7.06    0.05
   0   4  22   53.38    0.48
   0   4  23   90.50    0.88
   0   4  24   18.75    0.18
   0   4  25   71.01    0.72
   0   4  26   88.95    0.74
   0   4  27   50.70    0.37
   0   4  28   17.21    0.17
   0   4  29    0.02    0.03
   0   4  30    0.48    0.03
   0   4  31    0.66    0.04
   0   4  32    0.78    0.04
   0   4  33   39.64    0.52
   0   4  34    0.63    0.04
   0   4  35    2.01    0.09
   0   6   0   21.76    1.16
   0   6   1   50.14    1.12
   0   6   2   56.96    1.45
   0   6   3   47.09    0.55
   0   6   4   15.79    0.15
   0   6   5  125.88    1.49
   0   6   6    8.76    0.06
   0   6   7    5.66    0.06
   0   6   8   29.35    0.27
   0   6   9   10.38    0.11
   0   6  10   24.21    0.49
   0   6  11   54.34    0.76
   0   6  12   85.37    0.82
   0   6  13   53.58    0.53
   0   6  14  105.16    0.92
   0   6  15    0.55    0.04
   0   6  16    5.19    0.11
   0   6  17    2.78    0.05
   0   6  18   18.96    0.17
   0   6  19   54.39    0.62
   0   6  20   30.84    0.30
   0   6  21    0.24    0.03
   0   6  22    0.54    0.03
   0   6  23   78.03    0.76
   0   6  24   88.96    0.96
   0   6  25   15.62    0.19
   0   6  26    1.98    0.07
   0   6  27    3.31    0.07
   0   6  28    5.57    0.08
   0   6  29   28.04    0.38
   0   6  30    2.24    0.06
   0   6  31    1.17    0.05
   0   6  32    0.19    0.03
   0   6  33    0.06    0.07
   0   8   0    1.72    0.10
   0   8   1   31.44    0.34
   0   8   2    1.85    0.05
   0   8   3    0.06    0.04
   0   8   4    9.38    0.15
   0   8   5    2.19    0.11
   0   8   6    0.66    0.05
   0   8   7    4.73    0.18
   0   8   8   35.19    0.56
   0   8   9   47.96    0.72
   0   8  10   24.67    0.38
   0   8  11   25.12    0.30
   0   8  12    2.67    0.07
   0   8  13    0.76    0.06
   0   8  14   15.88    0.23
   0   8  15   16.85    0.21
   0   8  16    1.15    0.06
   0   8  17   19.61    0.28
   0   8  18   12.81    0.20
   0   8  19    4.13    0.11
   0   8  20  135.66    1.76
   0   8  21    0.73    0.09
   0   8  22   46.11    0.56
   0   8  23    0.21    0.05
   0   8  24   60.32    0.75
   0   8  25    2.91    0.09
   0   8  26   10.05    0.20
   0   8  27    1.94    0.07
   0   8  28   19.00    0.64
   0   8  29    1.93    0.27
   0  10   0  406.89    8.74
   0  10   1   15.12    0.32
   0  10   2  108.32    1.86
   0  10   3   59.95    0.93
   0  10   4    3.02    0.10
   0  10   5    7.81    0.22
   0  10   6    2.89    0.09
   0  10   7   10.72    0.24
   0  10   8    0.25    0.15
   0  10   9    1.74    0.12
   0  10  10    5.95    0.32
   0  10  11    1.94    0.13
   0  10  12   58.84    1.61
   0  10  13    3.61    0.15
   0  10  14    0.00    0.06
   0  10  15   50.06    1.45
   0  10  16    1.21    0.06
   0  10  17   15.13    0.40
   0  10  18    2.92    0.31
   0  10  19    2.64    0.26
   0  10  20    0.69    0.21
   0  10  21    0.13    0.08
   0  10  22    0.31    0.05
   0  10  23    3.54    0.56
   0  10  24    0.02    0.08
   0  12   2   36.62    2.88
   0  12   3   61.95    3.91
   0  12   4   23.20    1.57
   0  12   6    0.01    0.21
   0  12   7    0.97    0.28
   0  12   8   12.38    1.25
   0  12   9    1.30    0.40
   0  12  10   14.87    0.68
   0  12  11    6.58    0.21
   0  12  12    0.05    0.08
   0  12  13    0.74    0.10
   0  12  14    1.18    0.24
   0  12  15    0.03    0.23
   0  12  16    0.04    0.22
   0  12  17    0.07    0.23
   1   1   0    0.63    0.20
   1   1   2  522.74   16.38
   1   1   4   39.29    0.13
   1   1   5  171.25    2.95
   1   1   7  187.36    1.74
   1   1   8  294.43    4.37
   1   1   9    7.71    0.08
   1   1  10  198.63    2.33
   1   1  11  127.59    1.73
   1   1  12  212.84    1.79
   1   1  13  100.59    1.39
   1   1  14  209.03    2.48
   1   1  15  136.90    1.65
   1   1  16  108.57    1.67
   1   1  17   21.76    0.17
   1   1  18  111.16    0.68
   1   1  19    1.39    0.04
   1   1  20  104.43    0.89
   1   1  21    7.05    0.07
   1   1  22   18.22    0.18
   1   1  23    0.64    0.02
   1   1  24    6.58    0.13
   1   1  25   21.99    0.21
   1   1  26   19.56    0.17
   1   1  27   51.70    0.39
   1   1  28    0.23    0.03
   1   1  29   33.90    0.26
   1   1  30   79.48    0.71
   1   1  31   13.31    0.14
   1   1  32   21.40    0.16
   1   1  33   25.65    0.33
   1   1  34    9.75    0.09
   1   1  35    7.81    0.09
   1   1  36   33.97    0.49
   1   3   0  168.88    2.49
   1   3   1  218.70    1.84
   1   3   2  334.68    5.43
   1   3   3  145.83    2.63
   1   3   4   91.24    1.35
   1   3   5  386.13    7.37
   1   3   6  388.80    4.23
   1   3   7   78.91    1.07
   1   3   8   28.40    0.38
   1   3   9  115.34    1.40
   1   3  10  261.58    3.25
   1   3  11   60.76    0.73
   1   3  12   80.08    0.83
   1   3  13  312.32    2.80
   1   3  14    0.47    0.04
   1   3  15   49.01    0.36
   1   3  16  183.76    1.74
   1   3  17   34.35    0.50
   1   3  18   21.63    0.19
   1   3  19  133.84    1.11
   1   3  20   63.35    0.52
   1   3  21  108.39    0.82
   1   3  22  169.48    1.25
   1   3  23   37.48    0.23
   1   3  24   11.82    0.11
   1   3  25   40.22    0.36
   1   3  26   28.49    0.26
   1   3  27   34.47    0.34
   1   3  28   14.23    0.12
   1   3  30   16.37    0.15
   1   3  31   15.65    0.14
   1   3  32    8.34    0.09
   1   3  33   18.76    0.21
   1   3  34    0.14    0.02
   1   3  35    6.63    0.10
   1   5   0   71.55    1.06
   1   5   1   76.07    0.66
   1   5   2    7.39    0.19
   1   5   3   62.39    0.65
   1   5   4  105.97    1.42
   1   5   5  140.39    2.50
   1   5   6  542.70    7.47
   1   5   7    6.13    0.26
   1   5   8   71.91    1.09
   1   5   9   12.48    0.22
   1   5  10   55.49    0.69
   1   5  11   93.33    1.29
   1   5  12    9.17    0.13
   1   5  13   23.71    0.35
   1   5  14    1.88    0.06
   1   5  15   15.05    0.17
   1   5  16   27.60    0.29
   1   5  17   12.85    0.14
   1   5  18   17.56    0.21
   1   5  19   12.54    0.16
   1   5  20   17.46    0.20
   1   5  21    7.52    0.12
   1   5  22   56.78    0.53
   1   5  23    1.87    0.05
   1   5  24    7.20    0.09
   1   5  25   49.84    0.45
   1   5  26   14.36    0.15
   1   5  27    5.86    0.09
   1   5  28   23.49    0.25
   1   5  29    6.82    0.09
   1   5  30    2.87    0.06
   1   5  31    1.15    0.05
   1   5  32    3.06    0.08
   1   5  33   24.63    0.49
   1   5  34    8.23    0.17
   1   7   0    0.04    0.06
   1   7   1   61.82    1.56
   1   7   2   70.66    1.00
   1   7   3   59.56    1.00
   1   7   4   36.67    0.56
   1   7   5   52.17    0.74
   1   7   6  144.77    1.90
   1   7   7    2.11    0.06
   1   7   8    7.09    0.16
   1   7   9  145.15    1.93
   1   7  10    6.56    0.11
   1   7  11    1.23    0.04
   1   7  12   60.95    0.64
   1   7  13   21.93    0.31
   1   7  14    1.17    0.05
   1   7  15   30.22    0.36
   1   7  16   11.68    0.17
   1   7  17    6.29    0.10
   1   7  18    0.34    0.03
   1   7  19   11.13    0.15
   1   7  20    3.79    0.07
   1   7  21    5.31    0.10
   1   7  22   82.18    0.90
   1   7  23   22.35    0.26
   1   7  24   18.91    0.25
   1   7  25   36.05    0.41
   1   7  26    5.42    0.10
   1   7  27   12.68    0.18
   1   7  28    3.20    0.12
   1   7  29   19.72    0.34
   1   7  30    4.74    0.14
   1   7  31    8.96    0.36
   1   9   0   12.06    0.15
   1   9   1   12.84    0.27
   1   9   2   37.54    0.61
   1   9   3   30.90    0.47
   1   9   4   14.55    0.32
   1   9   5   64.13    1.10
   1   9   6   41.43    0.69
   1   9   7    5.75    0.17
   1   9   8    4.01    0.14
   1   9   9   20.63    0.44
   1   9  10   45.32    0.82
   1   9  11    3.29    0.10
   1   9  12   19.95    0.37
   1   9  13    2.65    0.08
   1   9  14   18.41    0.26
   1   9  15    3.16    0.11
   1   9  16   20.06    0.25
   1   9  17   38.05    0.51
   1   9  18   35.54    0.63
   1   9  19   10.58    0.20
   1   9  20   15.17    0.30
   1   9  21    4.40    0.11
   1   9  22   10.03    0.30
   1   9  23    6.27    0.26
   1   9  24   10.47    0.33
   1   9  25    8.19    0.49
   1   9  26    2.25    0.17
   1   9  27   19.74    0.77
   1  11   0   13.92    0.47
   1  11   1   94.41    2.48
   1  11   2    9.09    0.91
   1  11   3   23.47    0.66
   1  11   4   13.44    0.68
   1  11   5    6.90    0.43
   1  11   6   33.00    0.74
   1  11   7   12.02    0.37
   1  11   8    2.87    0.26
   1  11   9    6.14    0.27
   1  11  10    4.70    0.17
   1  11  11   14.30    0.44
   1  11  12    3.29    0.28
   1  11  13    0.12    0.11
   1  11  14    7.31    0.34
   1  11  15    1.30    0.26
   1  11  16    9.53    0.49
   1  11  17    2.63    0.41
   1  11  18   16.09    0.61
   1  11  19    7.11    0.51
   1  11  20    6.82    0.86
   1  13   3    0.36    0.31
   1  13   4    8.58    1.01
   1  13   5    0.13    0.25
   1  13   6    0.01    0.24
   1  13   7    5.80    0.97
   1  13   8   12.09    1.20
   1  13   9    1.16    0.26
   1  13  10   12.60    1.20
   2   0   1  146.72    2.08
   2   0   2   11.61    0.08
   2   0   3    6.53    0.15
   2   0   4  138.40    1.26
   2   0   5  152.50    1.66
   2   0   6  228.74    3.46
   2   0   7  517.96    6.47
   2   0   8    0.08    0.11
   2   0   9    2.51    0.06
   2   0  10   16.92    0.08
   2   0  11  133.25    1.47
   2   0  12  553.49    5.49
   2   0  13   21.67    0.23
   2   0  14   12.67    0.09
   2   0  15  128.64    1.43
   2   0  16  106.99    1.31
   2   0  17   85.73    0.73
   2   0  18   15.36    0.12
   2   0  19   14.96    0.18
   2   0  20   33.50    0.36
   2   0  21   65.59    0.50
   2   0  22    9.97    1.05
   2   0  23   15.35    0.13
   2   0  24   22.74    0.16
   2   0  25   11.51    0.11
   2   0  26  136.11    0.87
   2   0  27    4.42    0.05
   2   0  28   47.03    0.30
   2   0  29    3.08    0.05
   2   0  30    3.99    0.07
   2   0  31   29.56    0.27
   2   0  32   33.06    0.32
   2   0  33    1.08    0.05
   2   0  34    7.16    0.08
   2   0  35    7.16    0.11
   2   0  36   25.31    0.49
   2   2   0    0.13    0.05
   2   2   1  122.02    1.57
   2   2   2  167.82    1.88
   2   2   3  386.79    4.35
   2   2   4  209.52    2.13
   2   2   5  481.56    6.41
   2   2   6  655.24    9.94
   2   2   7  515.57    5.26
   2   2   8   81.32    0.63
   2   2   9  621.38    6.71
   2   2  10   46.94    0.69
   2   2  11  104.79    1.31
   2   2  12   20.55    0.14
   2   2  13    3.98    0.11
   2   2  14    4.19    0.05
   2   2  15   97.17    0.94
   2   2  16   18.64    0.26
   2   2  17  129.93    1.33
   2   2  18   13.75    0.11
   2   2  19    8.17    0.08
   2   2  20   88.99    0.69
   2   2  21   26.99    0.20
   2   2  22   60.19    0.41
   2   2  23    4.66    0.05
   2   2  24   20.32    0.20
   2   2  25   45.00    0.35
   2   2  26   17.14    0.13
   2   2  27   26.57    0.22
   2   2  28   18.64    0.18
   2   2  29   42.75    0.33
   2   2  30    3.54    0.07
   2   2  31   15.71    0.16
   2   2  32    3.43    0.06
   2   2  33    2.38    0.05
   2   2  34   15.62    0.19
   2   2  35    2.50    0.05
   2   4   0  439.21    5.04
   2   4   1    3.44    0.08
   2   4   2   12.50    0.16
   2   4   3  105.07    1.18
   2   4   4   84.26    1.20
   2   4   5  208.43    2.63
   2   4   6   86.01    1.25
   2   4   7   37.35    0.42
   2   4   8   89.24    1.30
   2   4   9   49.67    0.58
   2   4  10   19.55    0.25
   2   4  11   80.11    0.96
   2   4  12   11.68    0.13
   2   4  13    1.04    0.06
   2   4  14   34.01    0.38
   2   4  15    9.68    0.11
   2   4  16   21.94    0.27
   2   4  17   16.10    0.14
   2   4  18   10.82    0.12
   2   4  19    3.38    0.05
   2   4  20  111.01    0.96
   2   4  21   54.25    0.47
   2   4  22   14.05    0.12
   2   4  23   79.83    0.66
   2   4  24   80.77    0.70
   2   4  25   42.28    0.36
   2   4  26   10.26    0.10
   2   4  27   11.50    0.13
   2   4  28   65.95    0.55
   2   4  29    7.53    0.08
   2   4  30   13.56    0.14
   2   4  31    2.20    0.07
   2   4  32   42.88    0.51
   2   4  33   10.93    0.16
   2   4  34   28.32    0.52
   2   6   0    5.52    0.11
   2   6   1   90.39    1.83
   2   6   2  162.49    2.62
   2   6   3   67.40    1.15
   2   6   4    5.11    0.16
   2   6   5  175.51    2.51
   2   6   6   17.99    0.26
   2   6   7   75.16    1.05
   2   6   8   45.79    0.57
   2   6   9   14.58    0.23
   2   6  10   20.74    0.34
   2   6  11    5.53    0.14
   2   6  12   26.12    0.32
   2   6  13   17.16    0.22
   2   6  14   44.69    0.45
   2   6  15   20.31    0.24
   2   6  16   26.70    0.27
   2   6  17   18.34    0.21
   2   6  18   11.79    0.15
   2   6  19    2.93    0.08
   2   6  20   11.28    0.12
   2   6  21   13.50    0.16
   2   6  22    4.87    0.08
   2   6  23    3.37    0.07
   2   6  24   15.60    0.20
   2   6  25    3.71    0.08
   2   6  26   16.80    0.19
   2   6  27    2.14    0.06
   2   6  28    3.98    0.08
   2   6  29    5.60    0.10
   2   6  30    4.93    0.11
   2   6  31    4.90    0.20
   2   6  32    1.70    0.08
   2   8   0   67.74    1.00
   2   8   1   10.85    0.21
   2   8   2    6.75    0.12
   2   8   3   37.78    0.69
   2   8   4   23.26    0.49
   2   8   5   37.16    0.65
   2   8   6   34.68    0.67
   2   8   7  104.15    1.59
   2   8   8   97.13    1.62
   2   8   9   24.75    0.41
   2   8  10    4.05    0.10
   2   8  11   19.88    0.31
   2   8  12    4.49    0.14
   2   8  13    3.48    0.10
   2   8  14    0.23    0.06
   2   8  15    6.23    0.11
   2   8  16    9.12    0.14
   2   8  17   24.32    0.35
   2   8  18   11.52    0.22
   2   8  19    3.28    0.08
   2   8  20   30.93    0.48
   2   8  21   51.01    0.66
   2   8  22   19.59    0.30
   2   8  23   21.53    0.31
   2   8  24   14.38    0.29
   2   8  25   15.59    0.28
   2   8  26    1.62    0.13
   2   8  27   11.88    0.26
   2   8  28    3.68    0.30
   2  10   0    2.93    0.08
   2  10   1   46.49    0.86
   2  10   2   16.59    0.32
   2  10   3   64.57    1.19
   2  10   4   37.32    0.81
   2  10   5    2.02    0.14
   2  10   6    6.54    0.22
   2  10   7   24.84    0.48
   2  10   8   29.80    0.76
   2  10   9   34.74    0.85
   2  10  10    9.70    0.31
   2  10  11   18.07    0.37
   2  10  12    0.98    0.17
   2  10  13    7.27    0.27
   2  10  14   28.15    0.55
   2  10  15    6.10    0.18
   2  10  16   24.34    0.49
   2  10  17    0.54    0.08
   2  10  18    6.55    0.32
   2  10  19   28.79    0.72
   2  10  20    3.32    0.34
   2  10  22    4.78    0.70
   2  10  23    4.27    0.20
   2  10  24    0.85    0.19
   2  12   0   39.73    2.77
   2  12   1   18.56    1.64
   2  12   2   10.17    1.58
   2  12   3   16.26    2.35
   2  12   4   10.34    0.58
   2  12   5    1.14    0.17
   2  12   7   14.53    0.79
   2  12   8   31.89    1.47
   2  12   9   19.68    0.98
   2  12  11    8.42    0.95
   2  12  13    9.74    1.23
   2  12  14   13.80    1.28
   2  12  15   26.19    2.05
   2  12  16   11.96    1.14
   3   1   0  347.17    3.22
   3   1   1  153.00    1.69
   3   1   2  193.89    2.55
   3   1   3   17.57    0.20
   3   1   4  103.08    1.30
   3   1   5   50.18    0.56
   3   1   6  108.25    1.15
   3   1   7  136.48    1.39
   3   1   8   51.66    0.71
   3   1   9  571.28    6.76
   3   1  10   51.77    0.68
   3   1  11   14.52    0.20
   3   1  12   89.17    0.90
   3   1  13   61.00    0.69
   3   1  14   75.54    0.75
   3   1  15  177.62    1.72
   3   1  16  101.33    0.92
   3   1  17    3.40    0.06
   3   1  18   67.60    0.50
   3   1  19   10.46    0.08
   3   1  20   18.17    0.15
   3   1  22   21.83    0.18
   3   1  23   28.83    0.22
   3   1  24   10.01    0.65
   3   1  25   46.85    0.36
   3   1  26    2.86    0.05
   3   1  27   43.06    0.34
   3   1  28    0.87    0.03
   3   1  29   16.29    0.15
   3   1  30   29.52    0.27
   3   1  31   12.16    0.12
   3   1  32    4.31    0.06
   3   1  33    5.80    0.08
   3   1  34    3.59    0.06
   3   1  35   27.97    0.41
   3   3   0  174.65    2.09
   3   3   1   28.04    0.31
   3   3   2   31.72    0.38
   3   3   3  132.86    1.91
   3   3   4   14.05    0.23
   3   3   5  161.64    1.90
   3   3   6   95.58    1.41
   3   3   7  160.75    2.32
   3   3   8   11.68    0.20
   3   3   9  267.62    3.00
   3   3  10  153.77    1.90
   3   3  11  273.78    2.90
   3   3  12    8.59    0.21
   3   3  13    7.98    0.08
   3   3  14  111.43    0.97
   3   3  15   21.45    0.16
   3   3  16    6.68    0.07
   3   3  17   94.03    0.78
   3   3  18   43.44    0.39
   3   3  19   17.17    0.14
   3   3  20   57.02    0.41
   3   3  21    4.63    0.06
   3   3  22   13.06    0.13
   3   3  23   56.24    0.41
   3   3  24   38.78    0.32
   3   3  25   27.39    0.20
   3   3  26    6.38    0.07
   3   3  27   34.31    0.33
   3   3  28    6.69    0.07
   3   3  29   33.77    0.32
   3   3  31   13.42    0.15
   3   3  32   10.23    0.13
   3   3  33    0.98    0.04
   3   3  34   13.33    0.17
   3   5   0   29.06    0.65
   3   5   1   67.72    0.89
   3   5   2   19.19    0.24
   3   5   3   66.32    0.92
   3   5   4   19.91    0.17
   3   5   5   64.22    0.76
   3   5   6   12.21    0.16
   3   5   7   71.91    0.92
   3   5   8   27.80    0.42
   3   5   9    1.18    0.05
   3   5  10   97.73    1.32
   3   5  11    3.57    0.07
   3   5  12    8.96    0.19
   3   5  13   36.28    0.39
   3   5  14   10.14    0.18
   3   5  15   26.92    0.29
   3   5  16   36.63    0.31
   3   5  17   40.15    0.38
   3   5  18   56.01    0.48
   3   5  19   64.89    0.61
   3   5  20   24.46    0.24
   3   5  21   63.48    0.59
   3   5  22   29.59    0.28
   3   5  23    1.31    0.05
   3   5  24    1.26    0.05
   3   5  25   53.13    0.52
   3   5  26    4.71    0.10
   3   5  27   12.92    0.15
   3   5  28   20.05    0.23
   3   5  29   17.05    0.21
   3   5  30   24.66    0.30
   3   5  31    3.49    0.08
   3   5  32    9.48    0.22
   3   7   0    2.69    0.18
   3   7   1   39.19    0.66
   3   7   2   54.28    0.69
   3   7   3   98.29    1.32
   3   7   4   17.38    0.52
   3   7   5   13.51    0.30
   3   7   6   33.55    0.68
   3   7   7    1.54    0.09
   3   7   8   33.64    0.73
   3   7   9  129.97    2.06
   3   7  10   61.39    0.78
   3   7  11   70.52    1.10
   3   7  12   49.39    0.53
   3   7  13   18.45    0.21
   3   7  14    2.85    0.06
   3   7  15   17.03    0.23
   3   7  16    2.57    0.09
   3   7  17   17.33    0.18
   3   7  18    4.57    0.13
   3   7  19   52.39    0.63
   3   7  20    2.94    0.10
   3   7  21   49.18    0.63
   3   7  22   35.55    0.45
   3   7  23   42.23    0.49
   3   7  24   26.91    0.29
   3   7  25    5.99    0.13
   3   7  26    1.95    0.08
   3   7  27    6.67    0.12
   3   7  28   13.18    0.24
   3   7  29    1.74    0.13
   3   7  30    2.41    0.45
   3   9   0   17.07    0.28
   3   9   1    1.31    0.16
   3   9   2   23.48    0.46
   3   9   3   53.81    1.01
   3   9   4   38.08    0.85
   3   9   5   29.82    0.70
   3   9   6   73.93    1.39
   3   9   7   63.37    1.74
   3   9   8   28.48    0.59
   3   9   9   31.86    0.49
   3   9  10   14.06    0.30
   3   9  11   23.54    0.56
   3   9  12    7.15    0.19
   3   9  13   16.83    0.27
   3   9  14   15.44    0.37
   3   9  15   10.14    0.15
   3   9  16    8.19    0.22
   3   9  17    6.98    0.13
   3   9  18    5.48    0.14
   3   9  19    4.76    0.10
   3   9  20    2.22    0.08
   3   9  21    6.03    0.13
   3   9  22    7.07    0.17
   3   9  23   14.32    0.40
   3   9  24   18.84    0.64
   3   9  25   10.48    0.58
   3  11   0    5.91    0.37
   3  11   1   19.17    0.87
   3  11   2    8.52    0.32
   3  11   3   10.68    0.38
   3  11   4   17.35    0.63
   3  11   5    2.75    0.19
   3  11   6    9.87    0.40
   3  11   7   22.80    0.87
   3  11   8    1.87    0.18
   3  11   9    8.43    0.44
   3  11  10    3.16    0.22
   3  11  11   22.86    0.61
   3  11  12   42.06    1.17
   3  11  13    8.36    0.26
   3  11  14   19.36    0.59
   3  11  15   10.23    0.38
   3  11  16   12.62    0.41
   3  11  17    6.84    0.95
   3  11  18   32.95    1.94
   4   0   0   38.72    0.44
   4   0   1   20.98    0.29
   4   0   2   12.47    0.10
   4   0   3    7.92    0.15
   4   0   4   26.17    0.32
   4   0   5   30.66    0.33
   4   0   6   30.12    0.36
   4   0   7   21.21    0.32
   4   0   8   53.19    0.63
   4   0   9  270.93    3.13
   4   0  10  445.49    5.14
   4   0  11   40.01    0.40
   4   0  12    4.72    0.05
   4   0  13   10.75    0.13
   4   0  14  229.16    2.32
   4   0  15   15.33    0.15
   4   0  16  298.71    2.31
   4   0  17   53.61    0.43
   4   0  19    6.88    0.07
   4   0  20  100.55    0.92
   4   0  21   73.04    0.49
   4   0  22    1.18    0.04
   4   0  23   17.65    0.16
   4   0  24   39.11    0.33
   4   0  25   14.40    0.12
   4   0  26   59.02    0.40
   4   0  27   18.75    0.16
   4   0  28   12.64    0.10
   4   0  29    9.04    0.09
   4   0  30    9.31    0.11
   4   0  31   13.34    0.13
   4   0  32    0.50    0.03
   4   0  33   12.25    0.18
   4   0  34    9.87    0.22
   4   2   0   40.84    0.40
   4   2   1   67.52    1.09
   4   2   2   13.02    0.17
   4   2   3   34.01    0.71
   4   2   4  164.16    1.95
   4   2   5  172.33    1.61
   4   2   6  220.67    2.51
   4   2   7  242.68    3.11
   4   2   8  118.92    1.26
   4   2   9  271.25    3.93
   4   2  10   25.38    0.29
   4   2  11   11.32    0.24
   4   2  12   19.68    0.19
   4   2  13   29.12    0.33
   4   2  14   91.51    0.87
   4   2  15   69.04    0.46
   4   2  16   28.13    0.26
   4   2  17   33.78    0.30
   4   2  18    3.60    0.05
   4   2  19   22.46    0.20
   4   2  20    4.45    0.05
   4   2  21   23.70    0.23
   4   2  22   11.65    0.11
   4   2  23    3.27    0.07
   4   2  24   27.85    0.22
   4   2  25   31.61    0.22
   4   2  26    9.82    0.58
   4   2  27   20.68    0.21
   4   2  28    6.77    0.09
   4   2  29    1.01    0.04
   4   2  30   28.04    0.31
   4   2  31    3.24    0.07
   4   2  32    7.03    0.09
   4   2  33   10.03    0.12
   4   2  34   18.96    0.37
   4   4   0  439.18    6.13
   4   4   1   35.28    0.31
   4   4   2  420.80    6.19
   4   4   3    1.53    0.19
   4   4   4   41.12    0.42
   4   4   5   59.18    0.92
   4   4   6   78.74    0.70
   4   4   7   30.49    0.37
   4   4   8   87.75    0.94
   4   4   9   77.61    0.72
   4   4  10   64.08    0.80
   4   4  11   57.29    0.55
   4   4  12   37.27    0.51
   4   4  13  150.06    1.44
   4   4  14    1.65    0.07
   4   4  15   49.41    0.34
   4   4  16   68.05    0.63
   4   4  17   38.81    0.26
   4   4  18   88.03    0.90
   4   4  19   84.85    0.63
   4   4  20  157.50    1.17
   4   4  21   58.84    0.57
   4   4  22   94.05    0.72
   4   4  23   40.26    0.43
   4   4  24    6.24    0.12
   4   4  25   14.57    0.18
   4   4  26   14.42    0.20
   4   4  27    6.67    0.08
   4   4  28    3.83    0.08
   4   4  29   51.80    0.51
   4   4  30    2.27    0.20
   4   4  31   15.53    0.20
   4   4  32   24.12    0.40
   4   6   0    1.75    0.04
   4   6   1    8.17    0.12
   4   6   2   37.61    0.92
   4   6   3   11.95    0.26
   4   6   4   90.96    1.47
   4   6   5    9.01    0.20
   4   6   6   25.54    0.69
   4   6   7   17.65    0.29
   4   6   8   23.80    0.17
   4   6   9  110.71    1.21
   4   6  10   96.58    0.84
   4   6  11   30.47    0.31
   4   6  12   51.57    0.77
   4   6  13    2.91    0.06
   4   6  14  167.03    2.33
   4   6  15  207.43    2.22
   4   6  16    7.22    0.09
   4   6  17   53.21    0.54
   4   6  18  188.41    1.70
   4   6  19   27.10    0.27
   4   6  20   27.51    0.39
   4   6  21   43.60    0.49
   4   6  22   53.09    0.71
   4   6  23    5.62    0.08
   4   6  24    1.67    0.08
   4   6  25   13.62    0.22
   4   6  26    1.22    0.06
   4   6  27    3.58    0.08
   4   6  28    3.72    0.08
   4   6  29   10.21    0.17
   4   6  30    4.80    0.16
   4   8   0  109.94    2.30
   4   8   1   19.90    0.52
   4   8   2   23.34    0.61
   4   8   3    9.49    0.12
   4   8   4  179.73    2.61
   4   8   5   48.68    1.02
   4   8   6  171.60    3.95
   4   8   7   70.72    1.29
   4   8   8   54.75    1.04
   4   8   9   73.10    1.16
   4   8  10   94.82    1.74
   4   8  11   27.83    0.61
   4   8  12   17.64    0.36
   4   8  13   13.13    0.24
   4   8  14   16.94    0.21
   4   8  15   14.30    0.31
   4   8  16   14.03    0.23
   4   8  17    0.92    0.09
   4   8  18    3.03    0.09
   4   8  19   11.08    0.26
   4   8  20    7.43    0.15
   4   8  21   23.94    0.32
   4   8  22   18.67    0.30
   4   8  23   22.09    0.37
   4   8  24    2.93    0.10
   4   8  25    1.54    0.16
   4   8  26   11.77    0.50
   4  10   0   25.13    0.66
   4  10   1   40.91    1.70
   4  10   2    1.02    0.09
   4  10   3    4.84    0.33
   4  10   4   48.58    1.78
   4  10   5    8.07    0.48
   4  10   6   26.69    0.80
   4  10   7   46.83    1.21
   4  10   8   32.83    0.97
   4  10   9    8.36    0.49
   4  10  10    0.55    0.12
   4  10  11   31.16    1.30
   4  10  12    5.62    0.19
   4  10  14    6.87    0.22
   4  10  15   12.31    0.46
   4  10  16   15.30    0.63
   4  10  17    1.05    0.12
   4  10  18   11.56    0.33
   4  10  19    1.51    0.29
   4  10  20    5.43    0.43
   4  10  21   33.17    2.04
   4  12   0   40.72    2.70
   4  12   1    9.55    0.95
   4  12   2   12.15    1.14
   4  12   3   16.68    1.40
   4  12   4   54.71    3.90
   4  12   5   13.04    1.29
   4  12   6   21.71    1.72
   4  12   7   21.40    1.68
   4  12   8   21.38    1.75
   4  12   9   22.84    1.79
   4  12  10   25.68    1.86
   4  12  11    9.61    1.07
   5   1   0   25.41    0.34
   5   1   1  105.48    1.46
   5   1   2   34.98    0.49
   5   1   3  175.39    2.24
   5   1   4    8.47    0.15
   5   1   5   30.64    0.30
   5   1   6   21.94    0.24
   5   1   7  133.33    1.53
   5   1   8   22.75    0.26
   5   1   9   28.06    0.24
   5   1  10   90.07    0.78
   5   1  11   96.17    0.83
   5   1  12   24.98    0.21
   5   1  13   29.92    0.22
   5   1  14   22.20    0.19
   5   1  15   22.55    0.18
   5   1  16   44.72    0.34
   5   1  17   21.91    0.19
   5   1  18    7.24    0.08
   5   1  19    6.75    0.08
   5   1  20   11.89    0.11
   5   1  21   29.65    0.23
   5   1  22   19.99    0.17
   5   1  23   18.59    0.14
   5   1  24   13.21    0.13
   5   1  25    1.68    0.05
   5   1  26   12.40    0.11
   5   1  27   39.50    0.34
   5   1  28    0.12    0.03
   5   1  29    7.07    0.09
   5   1  30    9.80    0.12
   5   1  31   10.49    0.11
   5   1  32    1.95    0.05
   5   1  33    2.49    0.08
   5   3   0    3.51    0.04
   5   3   1  120.31    1.03
   5   3   2   11.79    0.12
   5   3   3   42.33    0.67
   5   3   4  180.11    2.01
   5   3   5   47.72    0.68
   5   3   6    7.35    0.19
   5   3   7    7.21    0.06
   5   3   8    3.85    0.11
   5   3   9    3.69    0.04
   5   3  10   23.80    0.18
   5   3  11    6.98    0.23
   5   3  12   47.58    0.49
   5   3  13   53.26    0.50
   5   3  14   15.87    0.12
   5   3  15   31.48    0.32
   5   3  16   12.78    0.10
   5   3  17   25.58    0.19
   5   3  18   19.75    0.14
   5   3  19   36.89    0.33
   5   3  20    6.45    0.09
   5   3  21    7.53    0.11
   5   3  22   17.63    0.14
   5   3  23    8.48    0.08
   5   3  24   20.23    0.19
   5   3  25    8.19    0.07
   5   3  26    7.45    0.10
   5   3  27   15.36    0.13
   5   3  28   23.40    0.22
   5   3  29    7.48    0.10
   5   3  30    7.26    0.09
   5   3  31    9.02    0.15
   5   3  32   19.49    0.44
   5   5   0    8.42    0.04
   5   5   1   31.01    0.31
   5   5   2   91.79    0.89
   5   5   3   55.13    0.51
   5   5   4   32.59    0.33
   5   5   5   30.43    0.30
   5   5   6    9.85    0.28
   5   5   7   29.05    0.32
   5   5   8    8.40    0.24
   5   5   9   32.65    0.37
   5   5  10   89.51    0.98
   5   5  11    3.08    0.08
   5   5  12   35.63    0.37
   5   5  13   18.61    0.20
   5   5  14  173.20    1.48
   5   5  15  113.51    1.03
   5   5  16  118.99    1.09
   5   5  17  228.21    2.04
   5   5  18  120.35    1.13
   5   5  19    7.73    0.11
   5   5  20   10.68    0.15
   5   5  21   37.97    0.39
   5   5  22    8.42    0.14
   5   5  23   15.60    0.19
   5   5  25   20.43    0.26
   5   5  26   12.85    0.15
   5   5  27    6.04    0.11
   5   5  28    2.66    0.07
   5   5  29    3.68    0.09
   5   5  30   10.00    0.28
   5   7   0    0.08    0.08
   5   7   1   31.78    0.65
   5   7   2    0.93    0.08
   5   7   3   31.84    0.57
   5   7   4   24.57    0.48
   5   7   5   20.68    0.28
   5   7   6   11.51    0.31
   5   7   7   23.20    0.34
   5   7   8   32.54    0.58
   5   7   9   39.70    0.72
   5   7  10   25.32    0.39
   5   7  11   56.55    0.90
   5   7  12   72.64    0.75
   5   7  13   68.00    0.72
   5   7  14   37.67    0.56
   5   7  15   38.54    0.41
   5   7  16   24.37    0.33
   5   7  17    6.75    0.14
   5   7  18    6.85    0.09
   5   7  19   29.92    0.35
   5   7  20    3.16    0.09
   5   7  21    7.46    0.10
   5   7  22    0.80    0.05
   5   7  23    3.59    0.10
   5   7  24    0.75    0.05
   5   7  25    6.69    0.14
   5   7  26    4.82    0.16
   5   7  27    8.16    0.35
   5   9   0    2.80    0.12
   5   9   1   60.33    1.56
   5   9   2    6.39    0.21
   5   9   3   15.39    0.43
   5   9   4    5.78    0.22
   5   9   5   97.76    3.37
   5   9   6   34.97    0.81
   5   9   7   18.15    0.54
   5   9   8    1.81    0.18
   5   9   9   30.22    0.80
   5   9  10   37.36    0.96
   5   9  11    2.04    0.22
   5   9  12   17.23    0.35
   5   9  13   22.29    0.48
   5   9  14    1.94    0.10
   5   9  15    5.10    0.14
   5   9  16   25.05    0.37
   5   9  17    1.16    0.05
   5   9  18    6.58    0.20
   5   9  19    0.75    0.07
   5   9  20    1.02    0.16
   5   9  21    1.06    0.18
   5   9  22    2.95    0.26
   5  11   1   11.84    0.37
   5  11   2    4.53    0.16
   5  11   6    8.12    0.30
   5  11   7    7.10    0.27
   5  11   8    2.48    0.15
   5  11   9    3.90    0.22
   5  11  10   17.42    0.63
   5  11  11    6.17    0.36
   5  11  12    6.97    0.39
   5  11  13    1.66    0.20
   5  11  14    6.84    0.39
   6   0   0    2.44    0.13
   6   0   1    1.94    0.04
   6   0   2    6.94    0.15
   6   0   3    0.54    0.03
   6   0   4    3.13    0.09
   6   0   5   13.84    0.14
   6   0   6    8.81    0.07
   6   0   7   37.96    0.36
   6   0   8   29.88    0.19
   6   0   9    1.49    0.03
   6   0  10    1.60    0.04
   6   0  11  139.07    0.89
   6   0  12   44.29    0.30
   6   0  13    8.51    0.07
   6   0  14   53.10    0.34
   6   0  15   72.43    0.48
   6   0  16   21.77    0.14
   6   0  17   20.99    0.15
   6   0  18    2.14    0.04
   6   0  19    3.76    0.05
   6   0  20   34.57    0.28
   6   0  21   44.64    0.36
   6   0  22   11.35    0.10
   6   0  23   12.04    0.10
   6   0  24   11.43    0.11
   6   0  25   31.25    0.28
   6   0  26    8.52    0.09
   6   0  27   10.14    0.09
   6   0  28    0.94    0.03
   6   0  29   16.75    0.17
   6   0  30    0.05    0.02
   6   0  31    4.52    0.11
   6   2   0  128.15    0.93
   6   2   1    6.22    0.08
   6   2   2   47.44    0.45
   6   2   3   49.73    0.47
   6   2   4   67.26    0.68
   6   2   5   56.30    0.51
   6   2   6   64.82    0.67
   6   2   7   44.77    0.34
   6   2   8    8.40    0.08
   6   2   9    4.76    0.33
   6   2  10    8.80    0.09
   6   2  11   34.74    0.25
   6   2  12    9.33    0.11
   6   2  13    7.19    0.08
   6   2  14    4.01    0.06
   6   2  15    8.31    0.08
   6   2  16   58.51    0.46
   6   2  17   26.76    0.21
   6   2  18   58.51    0.46
   6   2  19   27.59    0.21
   6   2  20    5.48    0.07
   6   2  21    9.49    0.10
   6   2  22    2.54    0.05
   6   2  23    3.90    0.06
   6   2  24   14.56    0.14
   6   2  25   15.59    0.16
   6   2  26   30.60    0.37
   6   2  27   11.94    0.13
   6   2  28    2.06    0.06
   6   2  29    0.44    0.03
   6   2  30    3.89    0.07
   6   2  31    2.04    0.13
   6   4   0   19.55    0.70
   6   4   1   42.00    0.37
   6   4   2   21.42    0.26
   6   4   3   37.57    0.32
   6   4   4   14.34    0.23
   6   4   5   26.24    0.25
   6   4   6    7.90    0.15
   6   4   7   26.32    0.26
   6   4   8   11.42    0.80
   6   4   9   16.79    0.17
   6   4  10   10.02    0.17
   6   4  11   99.06    0.87
   6   4  12   74.57    0.59
   6   4  13   55.36    0.56
   6   4  14   97.11    0.92
   6   4  16   35.20    0.30
   6   4  17   10.48    0.13
   6   4  18    6.63    0.10
   6   4  19   59.69    0.63
   6   4  20   17.29    0.23
   6   4  21   17.79    0.18
   6   4  22    2.94    0.06
   6   4  23   10.05    0.11
   6   4  24   10.04    0.14
   6   4  25    6.95    0.10
   6   4  26    5.98    0.08
   6   4  27    6.45    0.11
   6   4  28    1.25    0.05
   6   4  29    3.30    0.10
   6   6   0    0.71    0.02
   6   6   1    3.63    0.08
   6   6   2   16.70    0.14
   6   6   3    4.49    0.05
   6   6   4   31.49    0.28
   6   6   5   22.03    0.27
   6   6   6    2.64    0.08
   6   6   7   19.18    0.28
   6   6   8   15.77    0.25
   6   6   9   37.53    0.47
   6   6  10    3.69    0.07
   6   6  11   52.04    0.52
   6   6  12    1.25    0.06
   6   6  13   52.44    0.60
   6   6  14   87.33    0.92
   6   6  15   17.24    0.20
   6   6  16   84.03    0.91
   6   6  17   70.52    0.82
   6   6  18    9.96    0.62
   6   6  19   12.65    0.15
   6   6  20    2.30    0.07
   6   6  21    9.27    0.16
   6   6  22   11.29    0.15
   6   6  23   17.33    0.25
   6   6  24   14.22    0.19
   6   6  25   13.36    0.19
   6   6  26   17.21    0.32
   6   6  27    2.86    0.13
   6   8   0    8.85    0.22
   6   8   1    7.69    0.22
   6   8   2    9.99    0.23
   6   8   3   33.96    0.65
   6   8   4   45.27    0.83
   6   8   5    1.02    0.04
   6   8   6   38.12    0.63
   6   8   7   12.63    0.19
   6   8   8   41.01    0.68
   6   8   9    3.08    0.15
   6   8  10   19.45    0.28
   6   8  11    2.94    0.13
   6   8  12   25.84    0.40
   6   8  13    0.48    0.10
   6   8  14    8.20    0.16
   6   8  15    1.14    0.06
   6   8  16    2.17    0.08
   6   8  17    5.26    0.12
   6   8  18    2.96    0.09
   6   8  19    1.59    0.08
   6   8  20   14.78    0.31
   6   8  21    5.93    0.19
   6   8  22   18.10    0.59
   6  10   0    2.88    0.11
   6  10   1    7.77    0.17
   6  10   2    8.16    0.22
   6  10   3    1.97    0.14
   6  10   4    1.75    0.16
   6  10   5    0.29    0.07
   6  10   6    8.06    0.28
   6  10   7    5.65    0.23
   6  10   8    1.36    0.14
   6  10   9    6.92    0.31
   6  10  10    2.57    0.34
   6  10  11    3.37    0.24
   6  10  12   18.42    0.51
   6  10  13    3.17    0.23
   6  10  14   12.47    0.51
   6  10  15    2.34    0.19
   6  10  16    3.44    0.24
   7   1   0   24.17    0.10
   7   1   1   22.23    0.18
   7   1   2   73.31    0.46
   7   1   3   18.17    0.14
   7   1   4   26.06    0.25
   7   1   5    6.69    0.06
   7   1   6   30.35    0.31
   7   1   8   27.19    0.20
   7   1   9   18.31    0.14
   7   1  10   52.47    0.35
   7   1  11    0.99    0.03
   7   1  12    3.44    0.05
   7   1  13   47.34    0.35
   7   1  14    1.12    0.04
   7   1  15    5.75    0.06
   7   1  16   11.19    0.08
   7   1  17   17.60    0.14
   7   1  18   25.63    0.22
   7   1  19   18.15    0.15
   7   1  20    2.87    0.04
   7   1  21    0.77    0.03
   7   1  22    2.29    0.04
   7   1  23    1.32    0.04
   7   1  24    4.86    0.06
   7   1  25    1.87    0.05
   7   1  26    7.32    0.11
   7   1  27    2.04    0.05
   7   1  28    2.53    0.06
   7   1  29    0.60    0.05
   7   3   0   23.66    0.16
   7   3   1   40.88    0.29
   7   3   2   64.78    0.52
   7   3   3   23.31    0.24
   7   3   4   15.08    0.19
   7   3   5    6.79    0.09
   7   3   6   16.44    0.11
   7   3   7   59.77    0.55
   7   3   8   27.71    0.21
   7   3   9   52.77    0.48
   7   3  10  118.20    1.13
   7   3  11  130.46    1.07
   7   3  12   44.65    0.39
   7   3  13   19.60    0.18
   7   3  14   12.56    0.12
   7   3  15    1.89    0.05
   7   3  16    7.40    0.09
   7   3  17    5.69    0.09
   7   3  18   25.57    0.26
   7   3  19    8.45    0.13
   7   3  20    1.71    0.04
   7   3  21    5.17    0.08
   7   3  22   11.85    0.11
   7   3  23    1.75    0.04
   7   3  24   19.39    0.22
   7   3  25    0.34    0.03
   7   3  26    6.18    0.11
   7   3  27    2.06    0.08
   7   3  28    2.96    0.10
   7   5   0    2.86    0.06
   7   5   1    4.93    0.08
   7   5   2    7.65    0.46
   7   5   3   10.42    0.11
   7   5   4   17.94    0.19
   7   5   5   47.98    0.40
   7   5   6    8.04    0.58
   7   5   7   55.28    0.57
   7   5   8   28.36    0.30
   7   5   9   18.86    0.18
   7   5  10   18.06    0.95
   7   5  11   11.83    0.16
   7   5  12   18.02    0.19
   7   5  13    6.83    0.11
   7   5  14   24.64    0.28
   7   5  15   26.04    0.27
   7   5  16   15.19    0.17
   7   5  17   53.06    0.62
   7   5  18   20.81    0.22
   7   5  19   30.67    0.31
   7   5  20   19.87    0.24
   7   5  21   10.82    0.14
   7   5  22   19.50    0.28
   7   5  23   34.95    0.46
   7   5  24    0.41    0.04
   7   5  25    4.68    0.12
   7   5  26    2.69    0.16
   7   7   0  104.81    1.21
   7   7   1   10.13    0.13
   7   7   2   19.68    0.25
   7   7   3    4.14    0.09
   7   7   4   36.25    0.46
   7   7   5    2.93    0.08
   7   7   6    6.68    0.13
   7   7   7   59.39    0.80
   7   7   8    3.91    0.09
   7   7   9    8.65    0.12
   7   7  10   27.07    0.33
   7   7  11   29.14    0.34
   7   7  12   29.64    0.37
   7   7  13    8.97    0.15
   7   7  14   10.73    0.15
   7   7  17   11.55    0.18
   7   7  18    7.79    0.13
   7   7  19    2.43    0.07
   7   7  20   17.05    0.27
   7   7  21    3.03    0.10
   7   7  22   22.43    0.71
   7   9   0    1.43    0.08
   7   9   1    4.34    0.13
   7   9   2    8.10    0.22
   7   9   3    5.16    0.19
   7   9   4    2.12    0.12
   7   9   5   11.35    0.30
   7   9   6   14.39    0.37
   7   9   7    5.93    0.19
   7   9   8   12.38    0.35
   7   9   9    3.96    0.22
   7   9  10   45.55    0.96
   7   9  11   11.88    0.30
   7   9  12    3.37    0.16
   7   9  13    3.93    0.20
   7   9  14    7.10    0.28
   7   9  15   10.51    0.32
   7   9  16    4.35    0.19
   8   0   0  234.07    2.54
   8   0   1    2.30    0.04
   8   0   2   43.53    0.41
   8   0   3    7.42    0.09
   8   0   4  120.62    0.62
   8   0   5    7.89    0.06
   8   0   6   68.82    0.34
   8   0   7    1.60    0.04
   8   0   8    5.13    0.05
   8   0   9    8.51    0.08
   8   0  10   87.41    0.72
   8   0  11  217.13    1.45
   8   0  12   40.30    0.37
   8   0  13   10.37    0.10
   8   0  14    7.16    0.22
   8   0  15   63.00    0.47
   8   0  16    1.46    0.05
   8   0  17   15.02    0.12
   8   0  18   48.00    0.46
   8   0  19    3.73    0.05
   8   0  20    1.91    0.03
   8   0  21   60.52    0.50
   8   0  22   26.67    0.19
   8   0  23    0.95    0.03
   8   0  24    0.50    0.02
   8   0  25    0.06    0.02
   8   0  26    1.41    0.07
   8   2   0    1.60    0.02
   8   2   1   13.52    0.15
   8   2   2    3.02    0.07
   8   2   3    6.79    0.09
   8   2   4   78.16    0.71
   8   2   5  131.45    0.92
   8   2   6   25.57    0.17
   8   2   7   62.25    0.46
   8   2   8  150.22    1.00
   8   2   9   57.90    0.47
   8   2  10   19.02    0.12
   8   2  11   46.76    0.38
   8   2  12   27.90    0.28
   8   2  13    3.19    0.06
   8   2  14   26.80    0.28
   8   2  15   31.86    0.26
   8   2  16   42.34    0.34
   8   2  17   50.87    0.47
   8   2  18   32.20    0.26
   8   2  19   15.35    0.14
   8   2  20    2.38    0.05
   8   2  21    1.17    0.05
   8   2  22    1.08    0.06
   8   2  23    3.43    0.06
   8   2  24    6.38    0.10
   8   2  25   20.23    0.25
   8   2  26    0.49    0.04
   8   4   0    9.90    0.11
   8   4   1   14.19    0.16
   8   4   2   11.02    0.12
   8   4   3    9.92    0.14
   8   4   4   23.43    0.21
   8   4   5    9.96    0.08
   8   4   6   74.04    0.56
   8   4   7   22.97    0.25
   8   4   8   34.70    0.35
   8   4   9   42.00    0.34
   8   4  10    8.58    0.10
   8   4  11   36.36    0.34
   8   4  12   53.04    0.50
   8   4  13   56.96    0.59
   8   4  15   33.40    0.35
   8   4  16   23.02    0.24
   8   4  17    9.59    0.11
   8   4  18    6.98    0.10
   8   4  19   21.07    0.19
   8   4  20    7.94    0.10
   8   4  21   25.59    0.28
   8   4  22   11.29    0.15
   8   4  23   58.02    0.81
   8   4  24   20.31    0.41
   8   6   0   12.43    0.13
   8   6   1   47.12    0.50
   8   6   2   29.71    0.29
   8   6   3   13.06    0.13
   8   6   4    0.99    0.05
   8   6   5   67.15    0.67
   8   6   6   15.24    0.20
   8   6   7    0.31    0.04
   8   6   8   19.69    0.25
   8   6   9   25.18    0.32
   8   6  10    1.29    0.05
   8   6  11    2.10    0.06
   8   6  12    9.62    0.14
   8   6  13    6.28    0.11
   8   6  14    8.85    0.12
   8   6  15    2.63    0.07
   8   6  16    1.10    0.05
   8   6  17    1.74    0.05
   8   6  18    0.68    0.04
   8   6  19    9.18    0.17
   8   6  20    2.72    0.10
   8   6  21    8.02    0.29
   8   8   0    0.04    0.03
   8   8   1    2.01    0.07
   8   8   2    8.45    0.16
   8   8   3   21.66    0.38
   8   8   4   20.79    0.35
   8   8   5    6.58    0.14
   8   8   6   18.65    0.29
   8   8   7    0.15    0.03
   8   8   8    5.90    0.12
   8   8   9   25.15    0.37
   8   8  10   20.03    0.31
   8   8  11    0.74    0.10
   8   8  12    2.69    0.14
   8   8  13    5.50    0.17
   8   8  14    7.45    0.29
   8   8  15    1.71    0.13
   9   1   0   32.37    0.19
   9   1   1   97.96    0.63
   9   1   2    8.03    0.10
   9   1   3   92.04    0.65
   9   1   4   16.75    0.17
   9   1   5   58.88    0.41
   9   1   6    6.17    0.09
   9   1   7    7.65    0.08
   9   1   8   11.39    0.13
   9   1   9   11.77    0.09
   9   1  10    6.80    0.06
   9   1  11   25.56    0.20
   9   1  12    6.21    0.09
   9   1  13    7.62    0.07
   9   1  14   12.13    0.09
   9   1  15    1.79    0.04
   9   1  16    0.87    0.03
   9   1  17    3.67    0.06
   9   1  18   13.58    0.17
   9   1  19    6.37    0.07
   9   1  20    5.57    0.08
   9   1  21    3.07    0.06
   9   1  22    1.41    0.05
   9   1  23    6.77    0.14
   9   3   0   25.07    0.25
   9   3   1   12.06    0.18
   9   3   2   13.35    0.17
   9   3   3   81.82    0.63
   9   3   4   10.21    0.11
   9   3   5   44.08    0.34
   9   3   6    3.56    0.08
   9   3   7   10.57    0.13
   9   3   8   12.79    0.16
   9   3   9   11.11    0.15
   9   3  10   11.69    0.11
   9   3  11   35.21    0.38
   9   3  12    2.17    0.04
   9   3  13    6.81    0.08
   9   3  14    7.18    0.09
   9   3  15    5.96    0.08
   9   3  16    8.33    0.09
   9   3  17    7.61    0.11
   9   3  18    3.49    0.06
   9   3  19    1.73    0.05
   9   3  20   10.63    0.16
   9   3  21   25.54    0.35
   9   3  22    3.75    0.18
   9   5   0    1.25    0.04
   9   5   1   10.82    0.11
   9   5   2    0.60    0.03
   9   5   3    6.81    0.10
   9   5   4    1.24    0.04
   9   5   5    8.42    0.13
   9   5   6    4.62    0.07
   9   5   7   57.85    0.63
   9   5   8   12.15    0.14
   9   5   9    8.36    0.09
   9   5  10    3.84    0.07
   9   5  11   59.77    0.60
   9   5  12    6.08    0.10
   9   5  13    5.82    0.11
   9   5  14    0.11    0.03
   9   5  15    0.97    0.04
   9   5  16    7.23    0.11
   9   5  17   19.16    0.29
   9   5  18    5.18    0.18
   9   5  19    1.86    0.25
   9   7   0    3.82    0.08
   9   7   1    7.99    0.13
   9   7   2    7.62    0.14
   9   7   3    2.60    0.07
   9   7   4    4.32    0.09
   9   7   5   23.92    0.33
   9   7   6    3.85    0.09
   9   7   7   11.34    0.19
   9   7   8   13.15    0.22
   9   7   9    8.27    0.18
   9   7  10    3.29    0.11
   9   7  11    3.10    0.12
   9   7  12    1.86    0.16
   9   7  13    0.98    0.11
  10   0   0   31.12    0.62
  10   0   1  172.57    1.50
  10   0   2    3.28    0.04
  10   0   3    1.24    0.03
  10   0   4    1.01    0.04
  10   0   5    6.15    0.07
  10   0   6    3.03    0.06
  10   0   7    0.21    0.02
  10   0   8    8.22    0.11
  10   0   9    1.20    0.03
  10   0  10   40.27    0.31
  10   0  11   16.71    0.19
  10   0  12    1.57    0.03
  10   0  13    4.90    0.06
  10   0  14    0.14    0.03
  10   0  15   14.52    0.17
  10   0  16    0.95    0.03
  10   0  17    5.50    0.08
  10   0  18   17.62    0.32
  10   2   0    3.05    0.04
  10   2   1    1.93    0.04
  10   2   2   37.38    0.31
  10   2   3    0.26    0.02
  10   2   4   12.75    0.12
  10   2   5    9.34    0.09
  10   2   6    9.80    0.08
  10   2   7    2.96    0.05
  10   2   8    1.16    0.04
  10   2   9   12.07    0.11
  10   2  10    0.77    0.03
  10   2  11   18.34    0.18
  10   2  12   10.47    0.15
  10   2  13    5.11    0.08
  10   2  14    1.98    0.04
  10   2  15    6.96    0.09
  10   2  16    4.35    0.06
  10   2  17    4.56    0.11
  10   2  18   11.54    0.21
  10   4   0    3.24    0.06
  10   4   1    0.99    0.04
  10   4   2    4.83    0.07
  10   4   3    0.68    0.03
  10   4   4    2.16    0.05
  10   4   5   16.05    0.17
  10   4   6    2.95    0.07
  10   4   7    1.71    0.05
  10   4   8    0.96    0.05
  10   4   9   44.10    0.48
  10   4  10   12.22    0.14
  10   4  11   10.63    0.12
  10   4  12   11.51    0.15
  10   4  13    4.21    0.08
  10   4  14    5.18    0.15
  10   4  15    4.69    0.15
  10   6   0    0.22    0.05
  10   6   1    8.35    0.18
  10   6   2    2.06    0.08
  10   6   3    5.49    0.18
  10   6   4    1.93    0.07
  10   6   5    5.34    0.11
  10   6   6    5.66    0.14
  10   6   7    1.01    0.14
  10   6   8    3.82    0.37
  10   6   9    6.69    0.35
  11   1   0    7.75    0.08
  11   1   1    7.47    0.10
  11   1   2   16.75    0.20
  11   1   3   20.72    0.21
  11   1   4   36.70    0.38
  11   1   5    3.77    0.06
  11   1   6    6.92    0.08
  11   1   7    1.69    0.04
  11   1   8   18.04    0.20
  11   1   9    2.14    0.04
  11   1  10    3.03    0.06
  11   1  11    7.14    0.11
  11   1  12    9.29    0.37
  11   3   0    4.01    0.09
  11   3   1    1.65    0.05
  11   3   2   11.83    0.17
  11   3   3    3.32    0.08
  11   3   4    3.31    0.08
  11   3   5    2.31    0.06
  11   3   6    1.86    0.08
  11   3   7    1.20    0.06
  11   3   8    0.43    0.04
  11   3   9    2.70    0.08
   0   0   0    0.00    0.00
;
_shelx_hkl_checksum               74790
_olex2_submission_special_instructions 'No special instructions were received'
